# Supplementary material
Source: PubMed Central journal article supplement (PMC6980694)

# Design, Synthesis and Discovery of andrographolide derivatives against Zika virus infection

Feng Li,<sup>a,1</sup> Emily M. Lee,<sup>b,1</sup> Xia Sun,<sup>a</sup> Decai Wang,<sup>a</sup> Hengli Tang,<sup>b,\*</sup> Guo-Chun Zhou<sup>a,\*</sup>

<sup>a</sup>School of Pharmaceutical Sciences, Nanjing Tech University, Nanjing, Jiangsu 211800, China

<sup>b</sup>Department of Biological Science, Florida State University, Tallahassee, FL 32306, USA

<sup>1</sup>These authors contributed equally to the work.

\*Corresponding authors: [gczhou@njtech.edu.cn](mailto:gczhou@njtech.edu.cn) (GC Zhou) or [tang@bio.fsu.edu](mailto:tang@bio.fsu.edu) (HL Tang)

## Contents

|                                                                         |             |
|-------------------------------------------------------------------------|-------------|
| Table S1-----                                                           | pS2         |
| NMR spectra-----                                                        | pS3 to pS18 |
| Details for compound dilutions and viral inoculation for screening----- | pS19        |
| HPLC spectra-----                                                       | pS20-pS31   |

**Table S1.** Anti-Zika activity (EC<sub>50</sub>) and cytotoxicity (CC<sub>50</sub>) to SNB-19 and Vero cell lines

| compd      | EC <sub>50</sub> (μM) | SNB-19 cell line <sup>a</sup> |                | Vero cell line <sup>b</sup> |      |
|------------|-----------------------|-------------------------------|----------------|-----------------------------|------|
|            |                       | CC <sub>50</sub> (μM)         | SI             | CC <sub>50</sub> (μM)       | SI   |
| <b>2</b>   | 25.9 ± 1.5            | 21.1 ± 1.1                    | 0.82           | 22.0 ± 0.4                  | 0.85 |
| <b>3</b>   | 1.3 ± 0.1             | 22.7 ± 1.1                    | 17.5           | 20.8 ± 0.5                  | 16.1 |
| <b>4</b>   | - <sup>c</sup>        | 49.5 ± 0.1                    | / <sup>d</sup> | 27.5 ± 0.1                  | /    |
| <b>5</b>   | -                     | 21.9 ± 0.1                    | /              | 12.8 ± 0.1                  | /    |
| <b>6</b>   | -                     | 61.2 ± 0.3                    | /              | 20.7 ± 0.3                  | /    |
| <b>7</b>   | 11.0 ± 0.2            | 60.1 ± 1.1                    | 5.5            | 22.8 ± 0.2                  | 2.1  |
| <b>8</b>   | -                     | 46.5 ± 0.6                    | /              | 26.2 ± 0.2                  | /    |
| <b>9</b>   | 12.5 ± 0.4            | 67.7 ± 1.1                    | 5.4            | 37.7 ± 0.1                  | 3.0  |
| <b>11a</b> | 8.5 ± 0.4             | 78.4 ± 1.0                    | 9.2            | 55.9 ± 0.2                  | 6.6  |
| <b>11b</b> | 16.6 ± 0.3            | 66.5 ± 1.0                    | 4.0            | 65.3 ± 0.3                  | 3.9  |
| <b>12a</b> | 25.8 ± 1.1            | >100                          | >3.9           | 99.8 ± 0.7                  | 3.9  |
| <b>12b</b> | -                     | >100                          | /              | 61.4 ± 0.2                  | /    |
| <b>13a</b> | -                     | 65.9 ± 0.2                    | /              | 46.5 ± 0.1                  | /    |
| <b>13b</b> | -                     | >100                          | /              | 50.61 ± 0.03                | /    |
| <b>14a</b> | -                     | 51.7 ± 0.2                    | /              | 46.7 ± 0.2                  | /    |
| <b>14b</b> | -                     | >100                          | /              | 72.4 ± 0.7                  | /    |
| <b>15a</b> | -                     | 39.3 ± 0.4                    |                | 55.9 ± 0.2                  | /    |
| <b>15b</b> | -                     | 63.5 ± 0.2                    | /              | 58.6 ± 3.4                  | /    |
| <b>16a</b> | 13.3 ± 0.5            | >100                          | >7.5           | >100                        | >7.5 |
| <b>16b</b> | 7.8 ± 0.4             | 85.2 ± 1.0                    | 10.9           | 82.5 ± 2.2                  | 7.5  |
| <b>17a</b> | -                     | 39.3 ± 0.2                    | /              | 51.9 ± 0.3                  | /    |
| <b>17b</b> | 4.5 ± 0.2             | 88.7 ± 1.1                    | 19.7           | 85.0 ± 1.6                  | 18.9 |
| <b>18a</b> | 24.6 ± 0.9            | 72.0 ± 1.0                    | 2.9            | 57.4 ± 0.3                  | 2.3  |
| <b>18b</b> | -                     | >100                          | /              | 64.7 ± 0.3                  | /    |

<sup>a</sup>incubation for 24 hours. <sup>b</sup>incubation for 48 hours. <sup>c</sup>“-” means “not active”. <sup>d</sup>“/” represents “not available”.

## NMR spectra

### $^1\text{H}$ NMR of **11a**

AGF-2, 1.1.1r

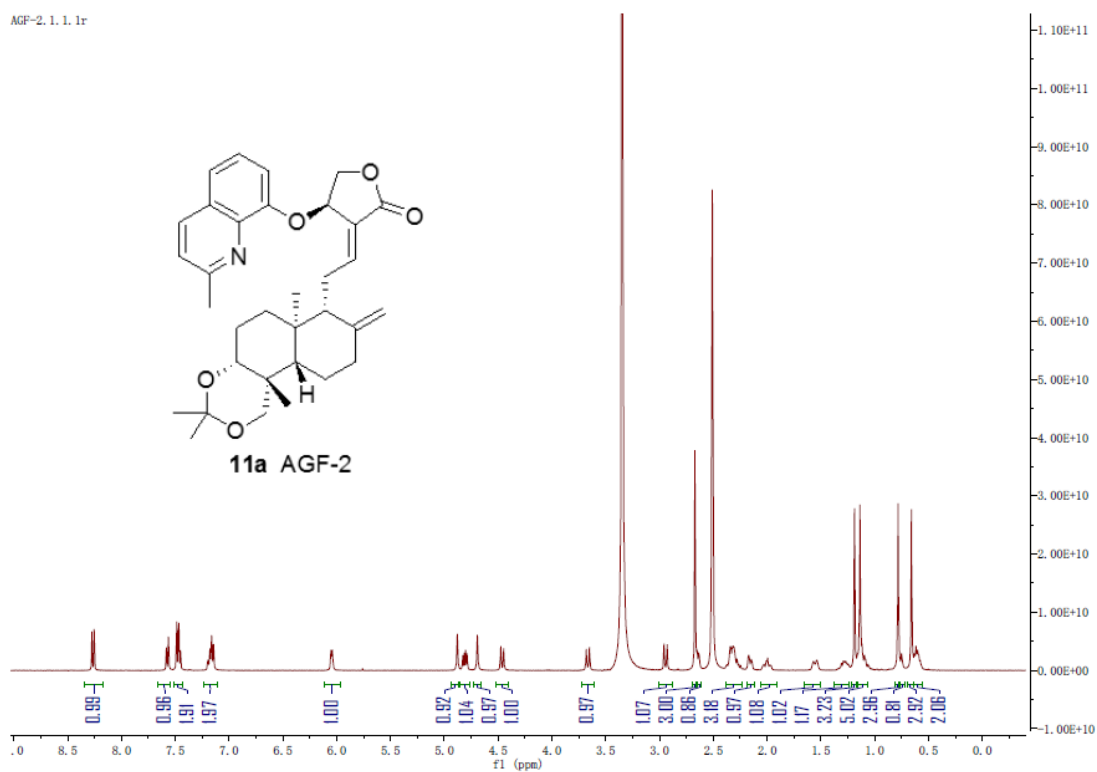

### $^{13}\text{C}$ NMR of **11a**

AGF-2, 1.1.1r

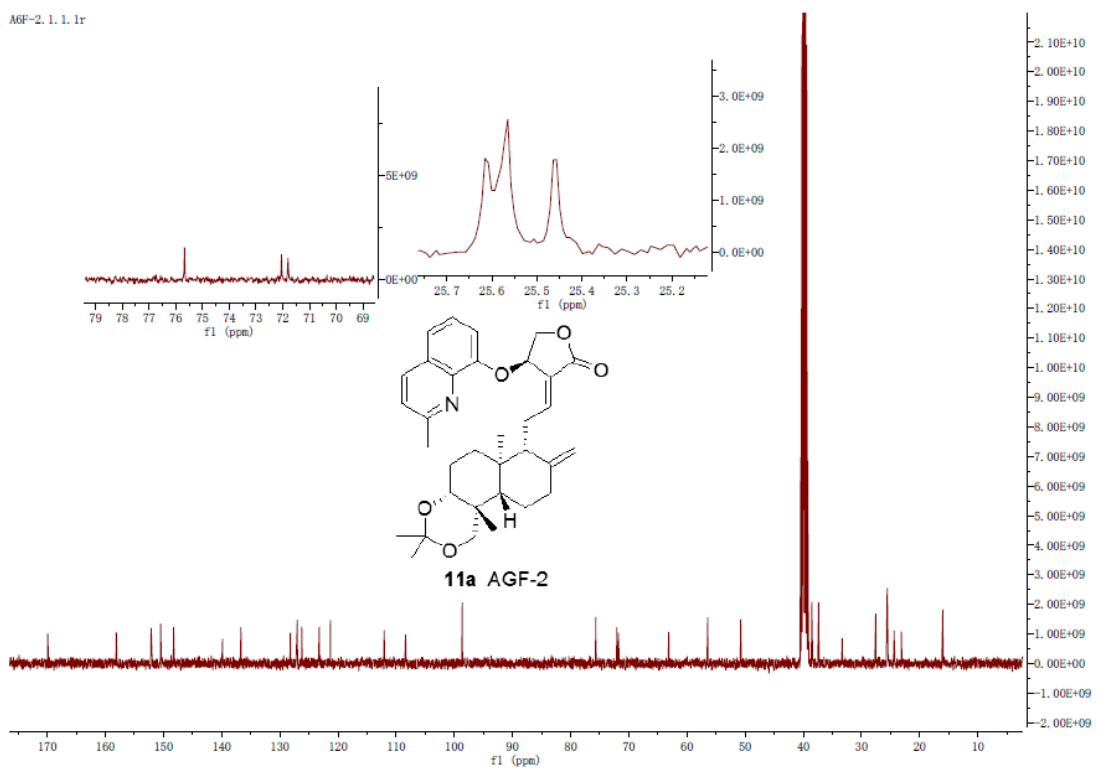

# <sup>1</sup>H NMR of **11b**

AGF-1.1.1.1r

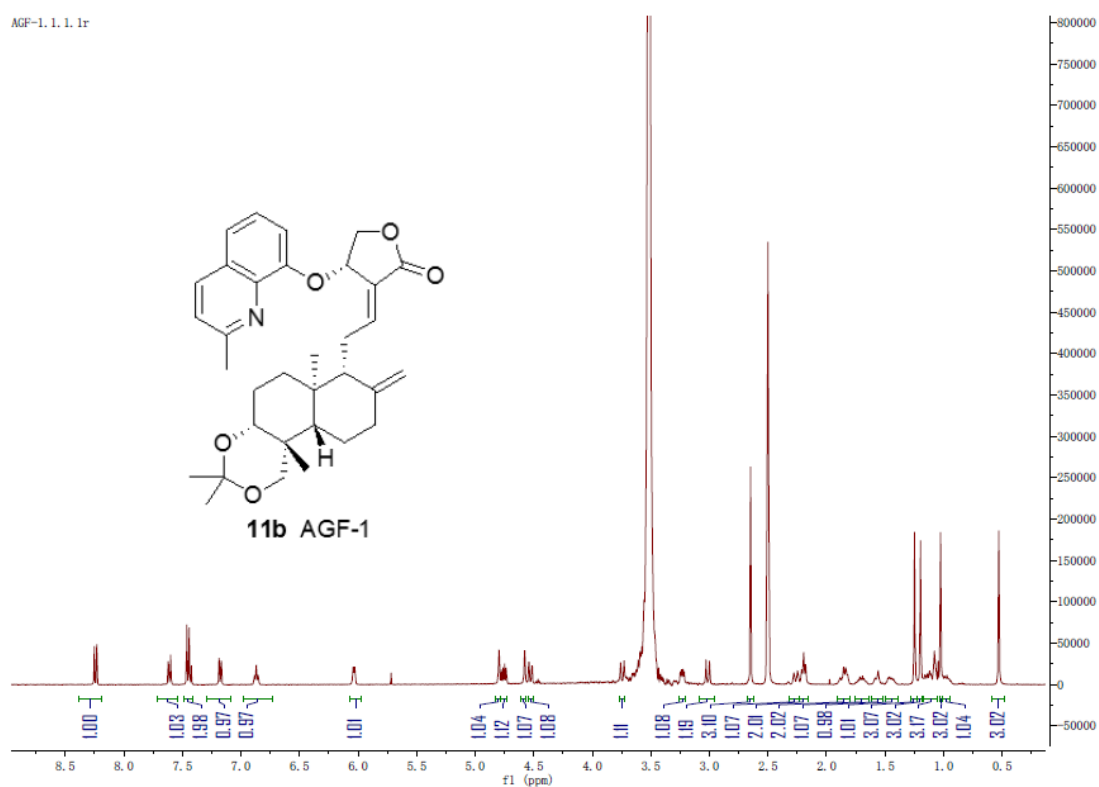

# <sup>13</sup>C NMR of **11b**

AGF-1.2.1.1r

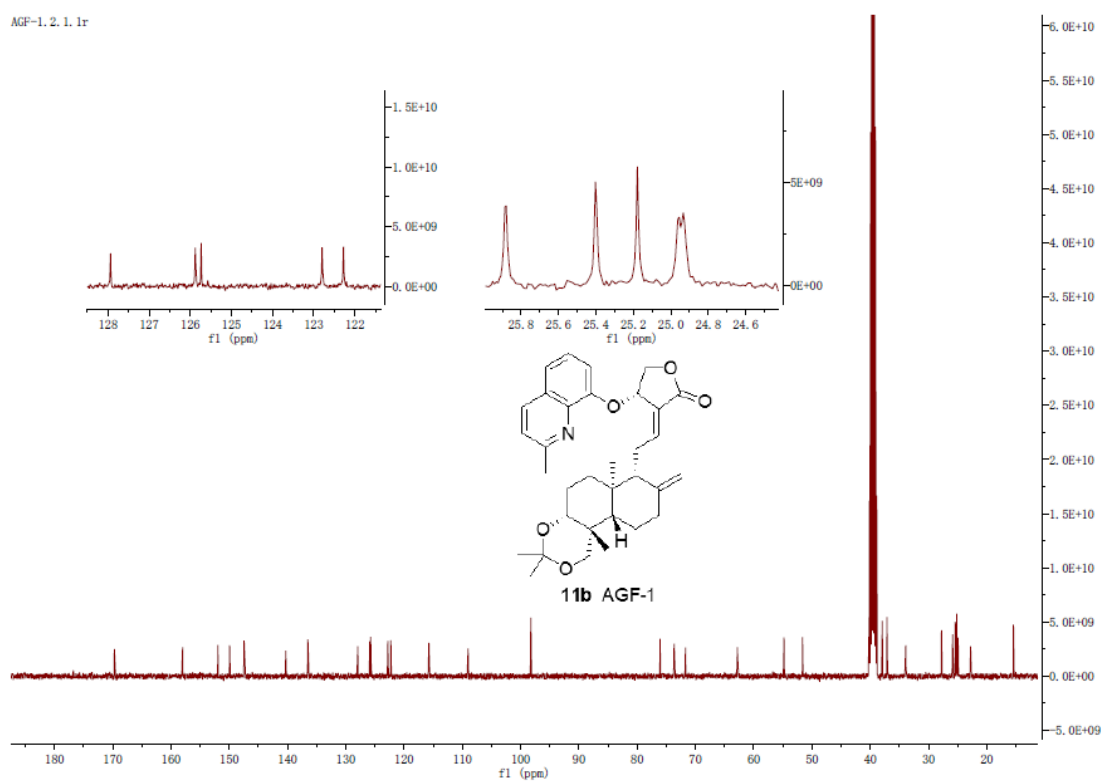

# <sup>1</sup>H NMR of 12a

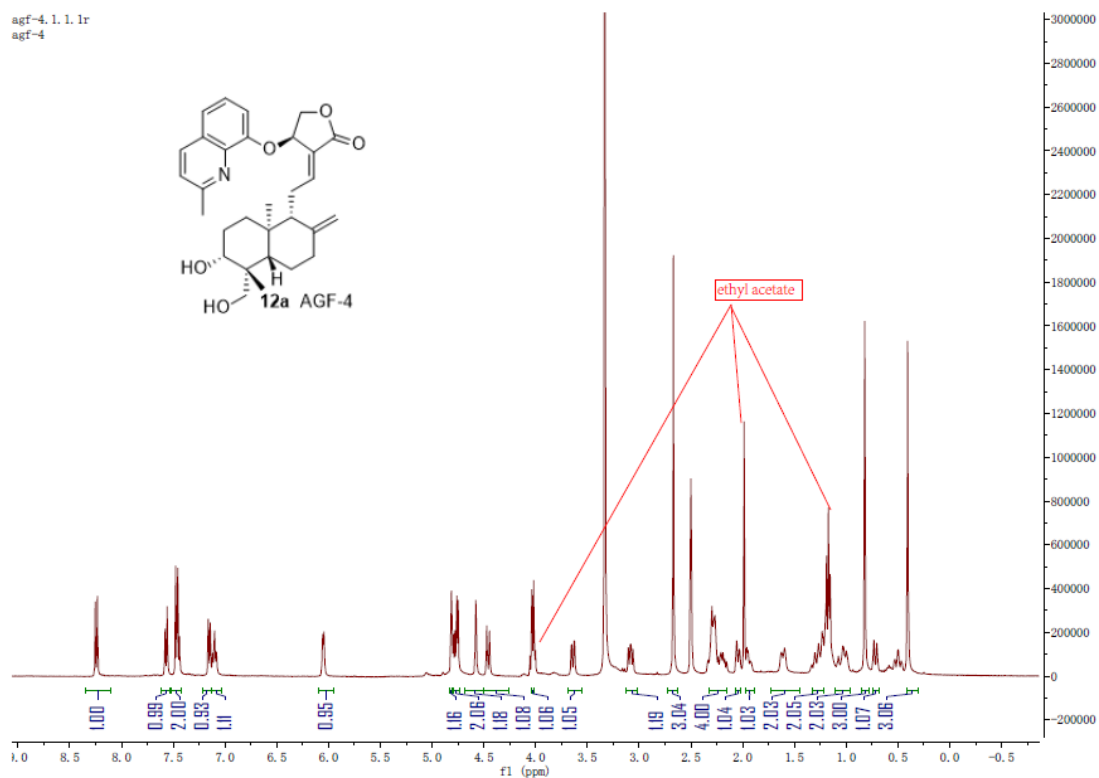

# <sup>13</sup>C NMR of 12a

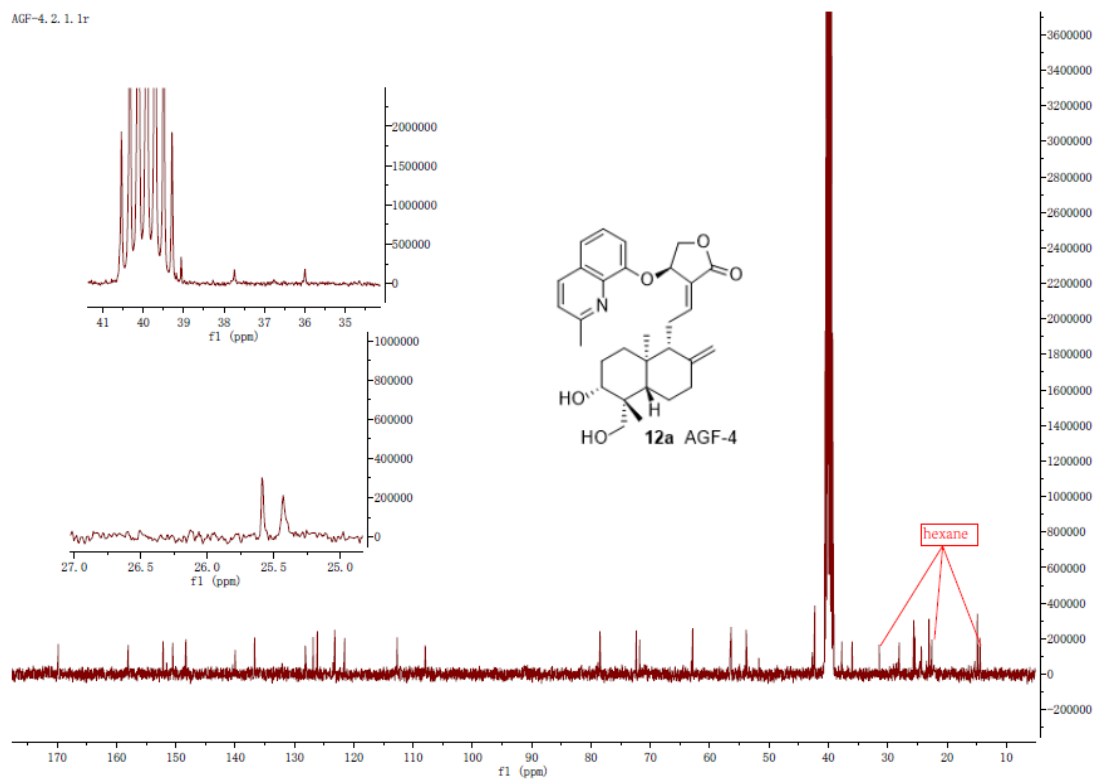

# <sup>1</sup>H NMR of **12b**

AGF-15. 1. 1. 1r

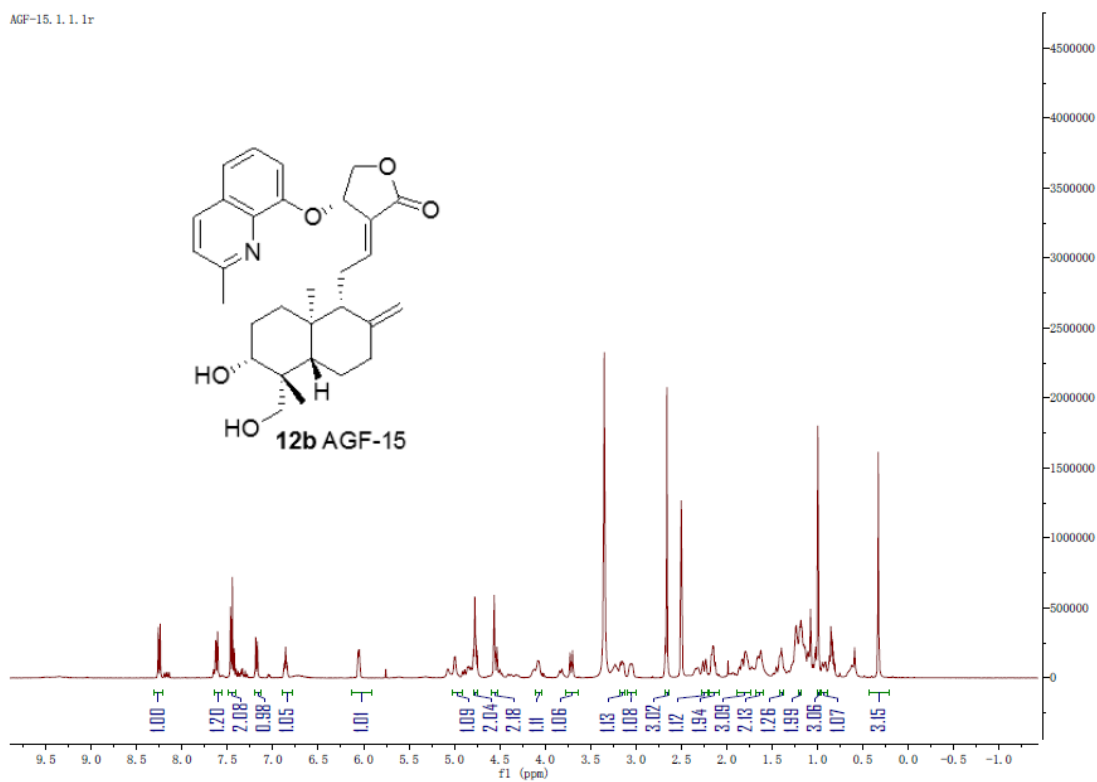

# <sup>13</sup>C NMR of **12b**

agf-15. 10. 1. 1r

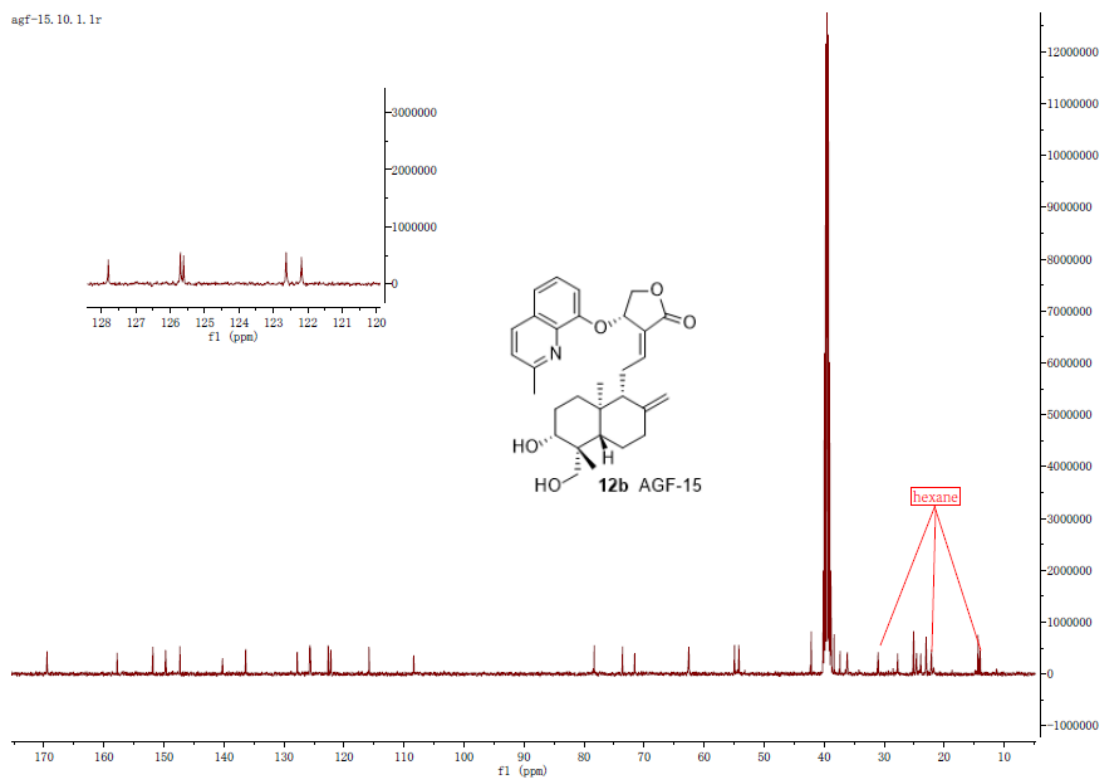

# <sup>1</sup>H NMR of **13a**

agf-9.1.1.1r

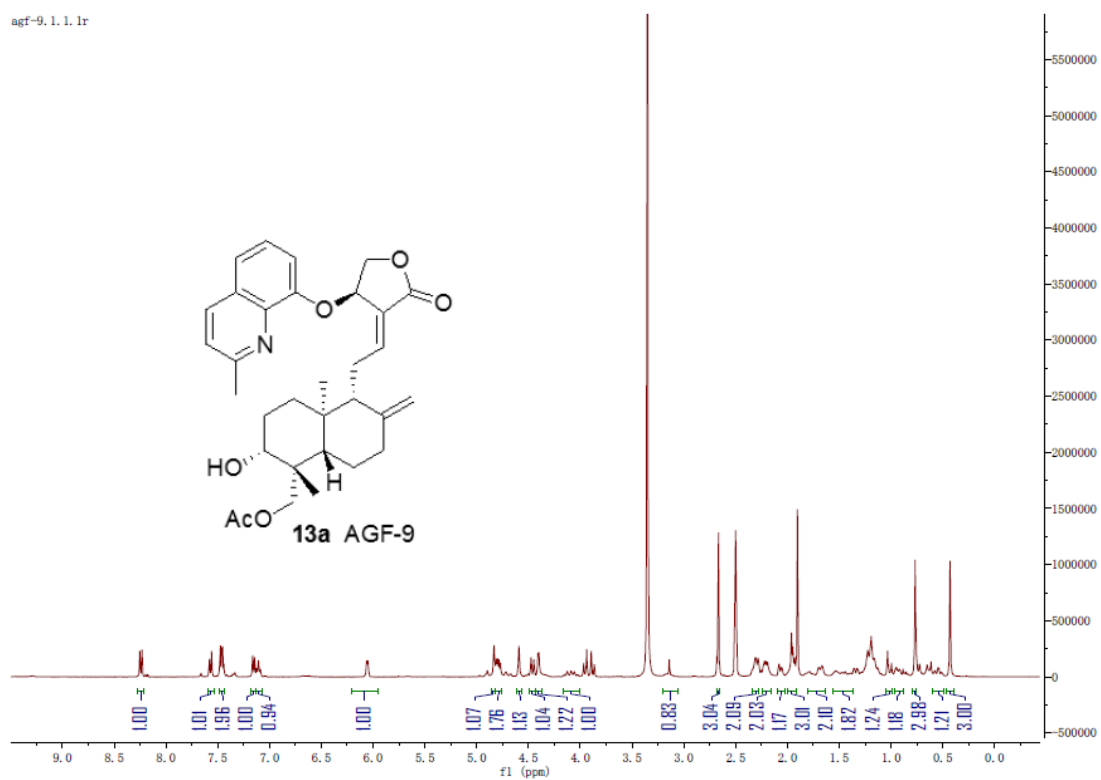

# <sup>13</sup>C NMR of **13a**

AGF-9.10.1.1r

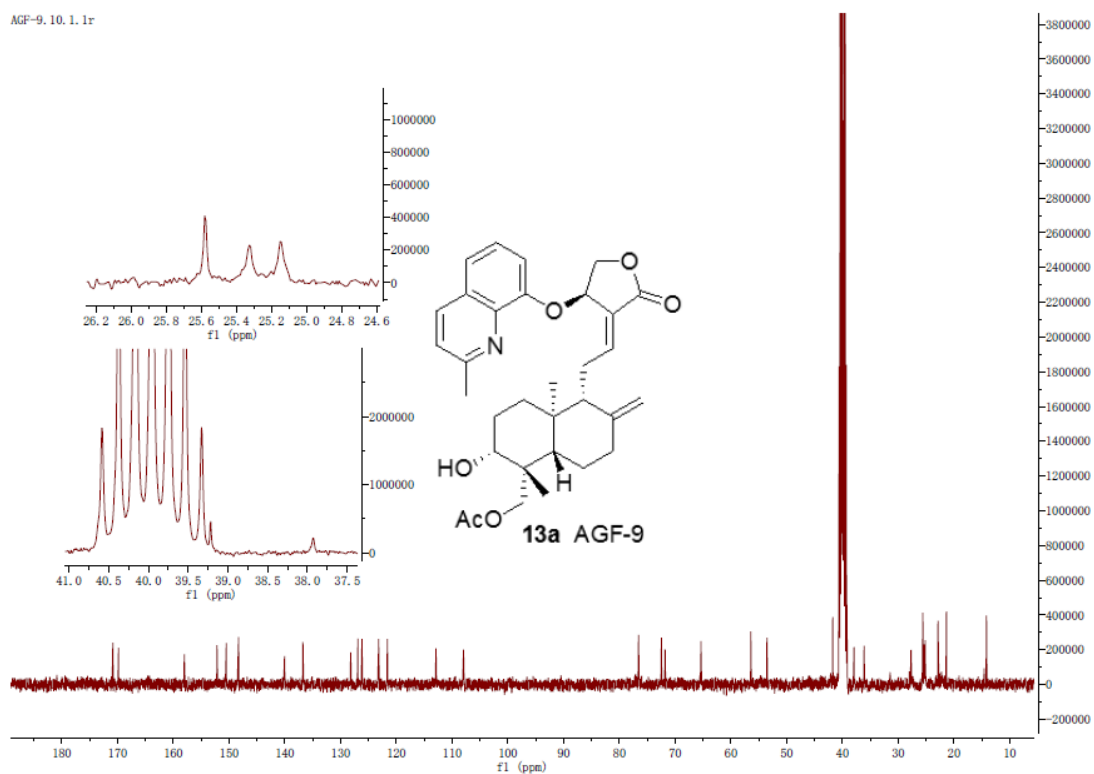

# <sup>1</sup>H NMR of **13b**

AGF-41. 1. 1. 1r

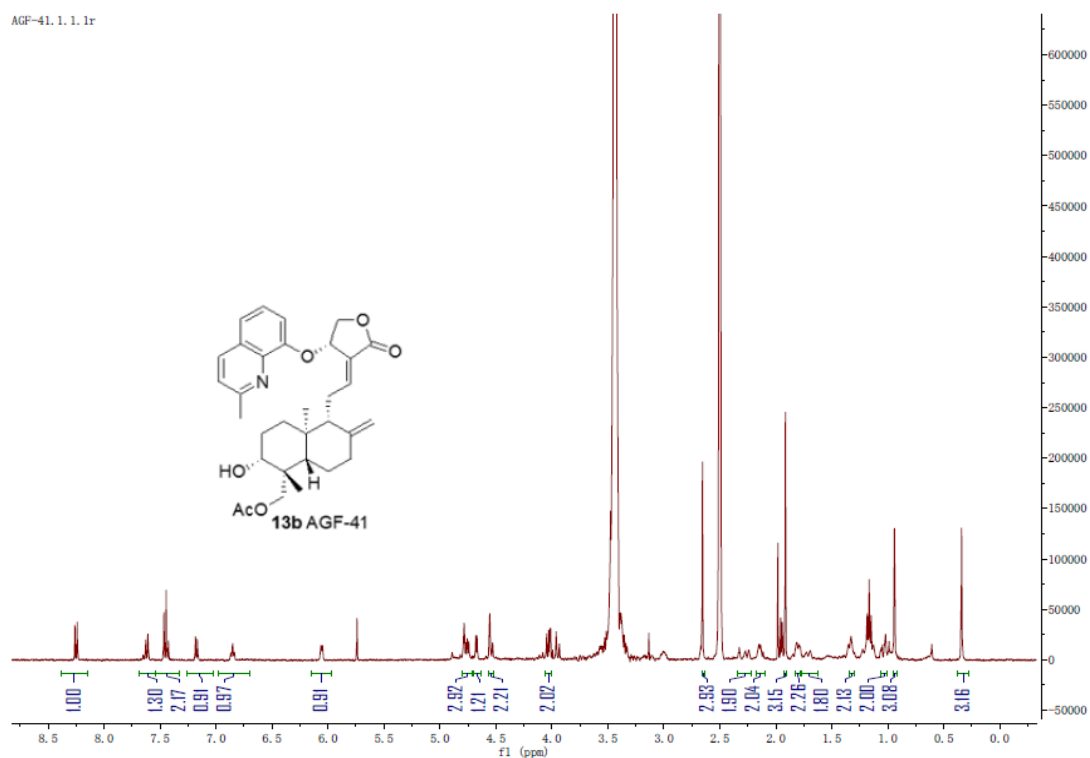

# <sup>13</sup>C NMR of **13b**

20190405-F. 2. 1. 1r  
AGF-41

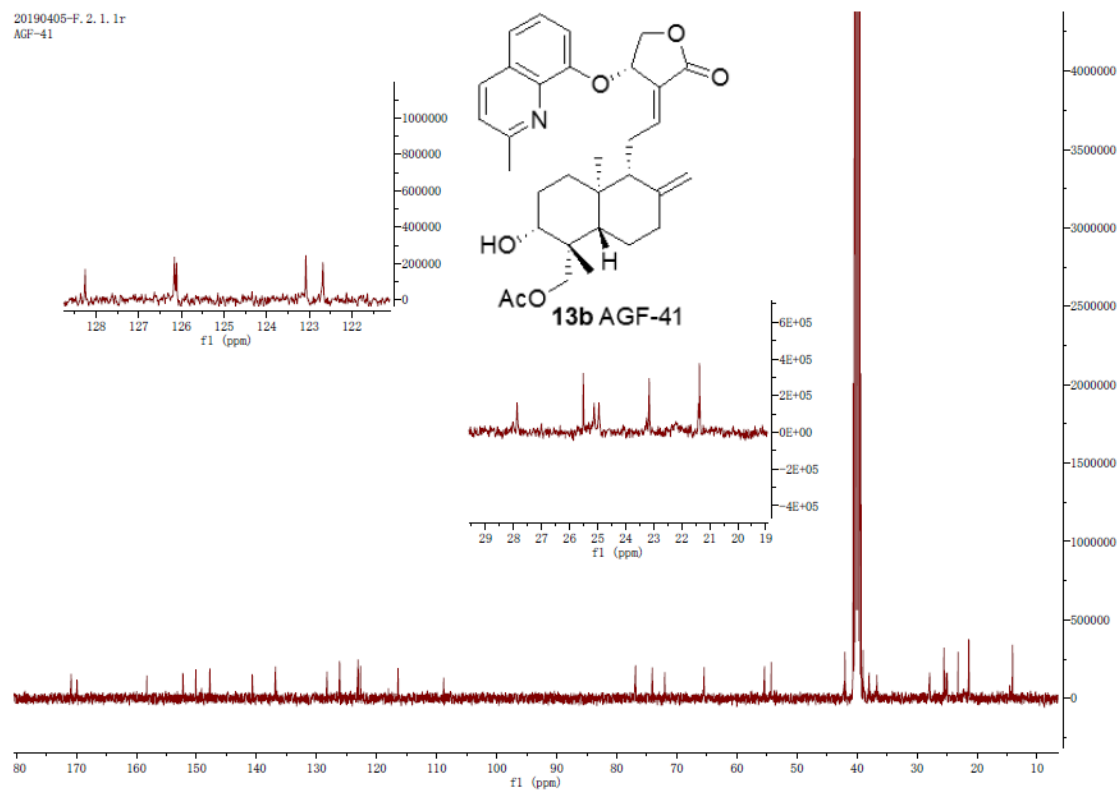



# <sup>1</sup>H NMR of 14a

AGF-43. 1. 1. 1r

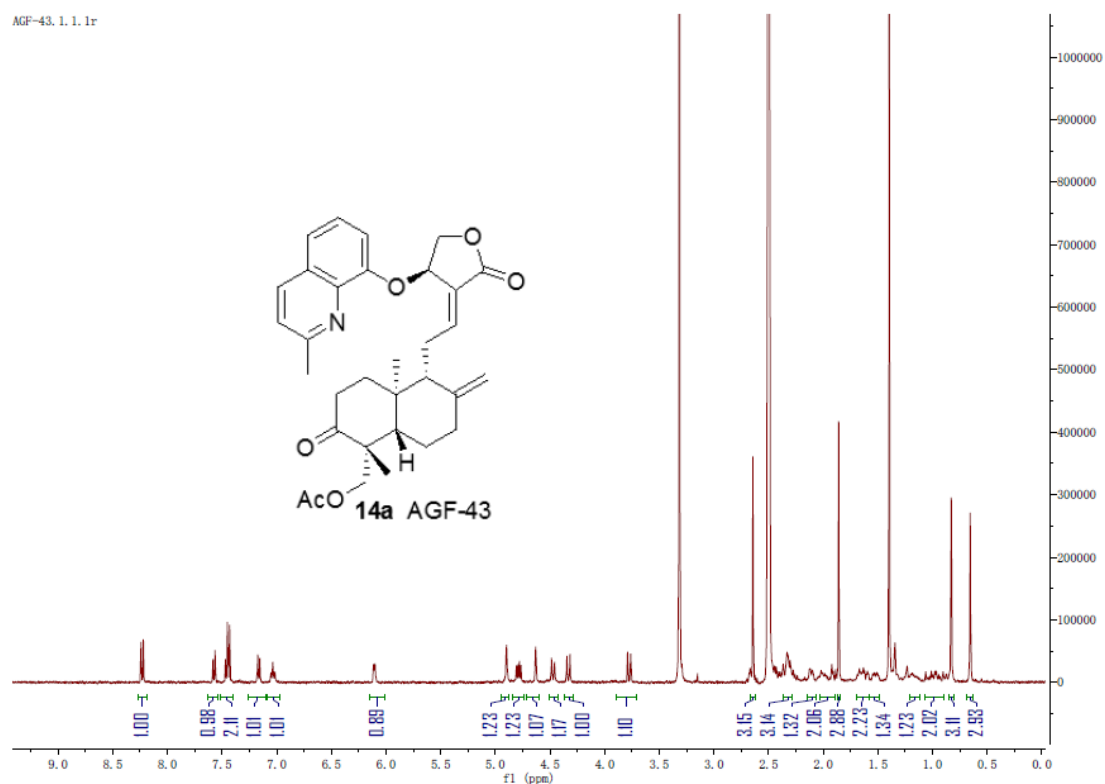

# <sup>13</sup>C NMR of 14a

agf-43. 10. 1. 1r

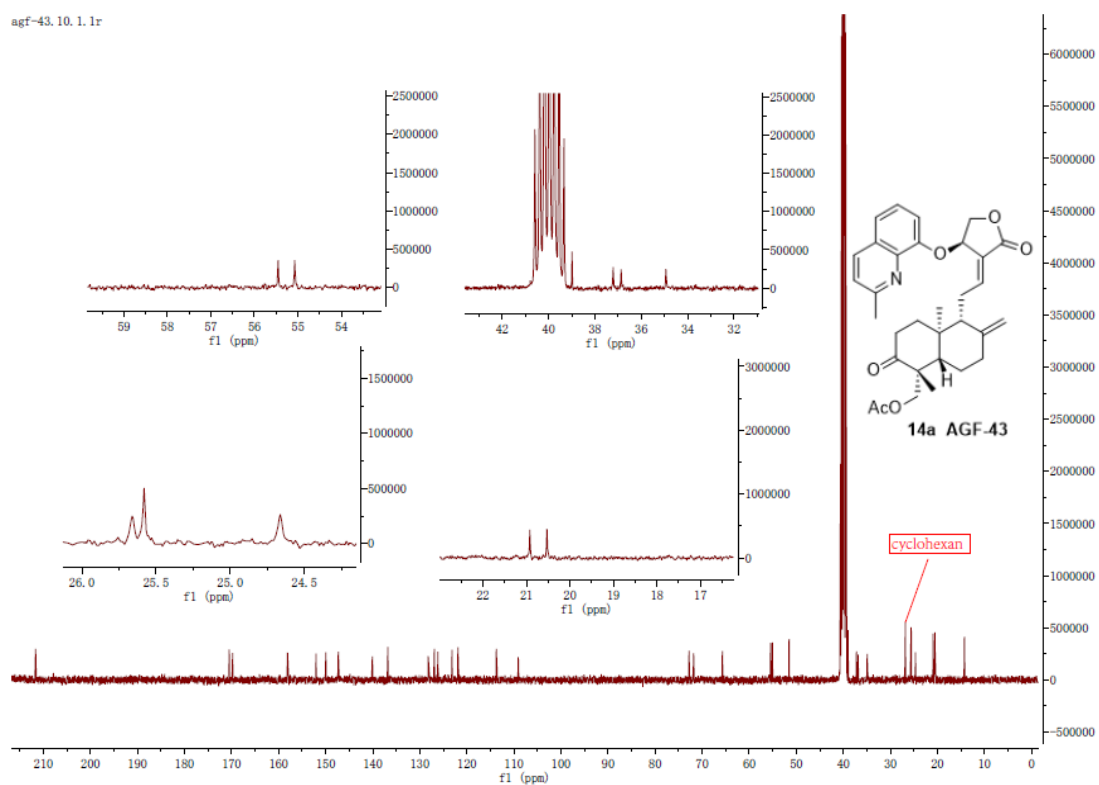

# <sup>1</sup>H NMR of **14b**

AGF-42. 1. 1. 1r

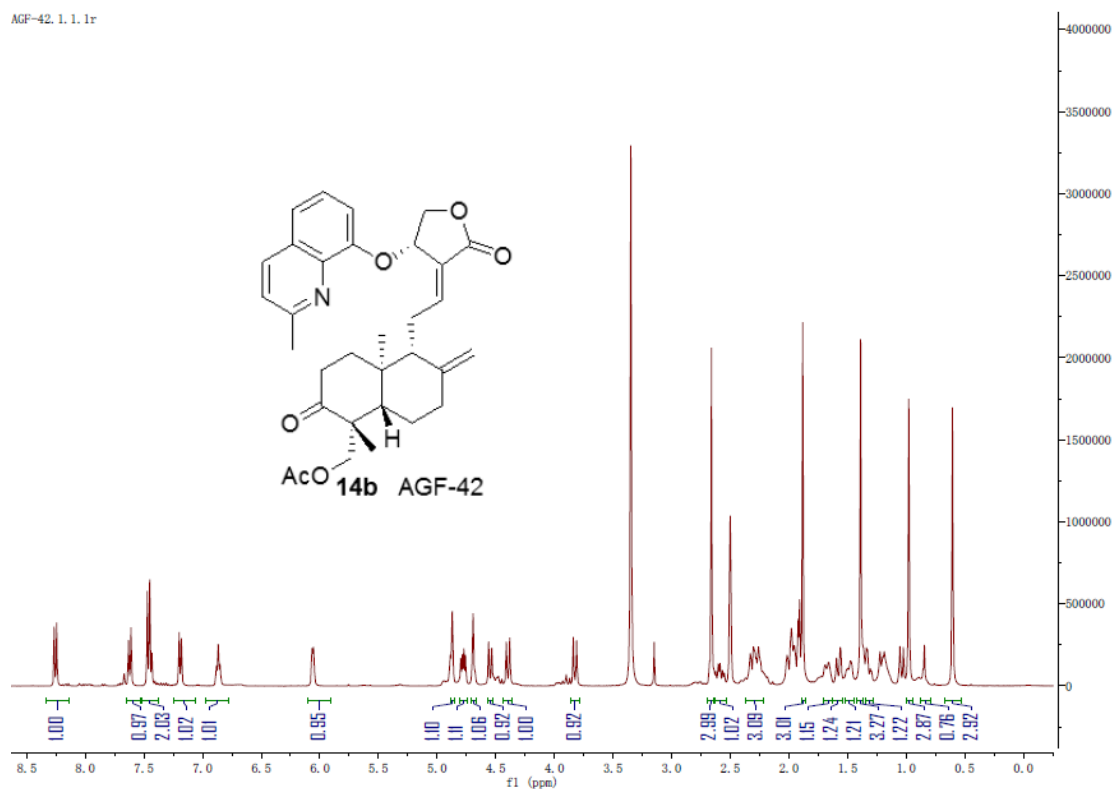

# <sup>13</sup>C NMR of **14b**

AGF-42. 2. 1. 1r

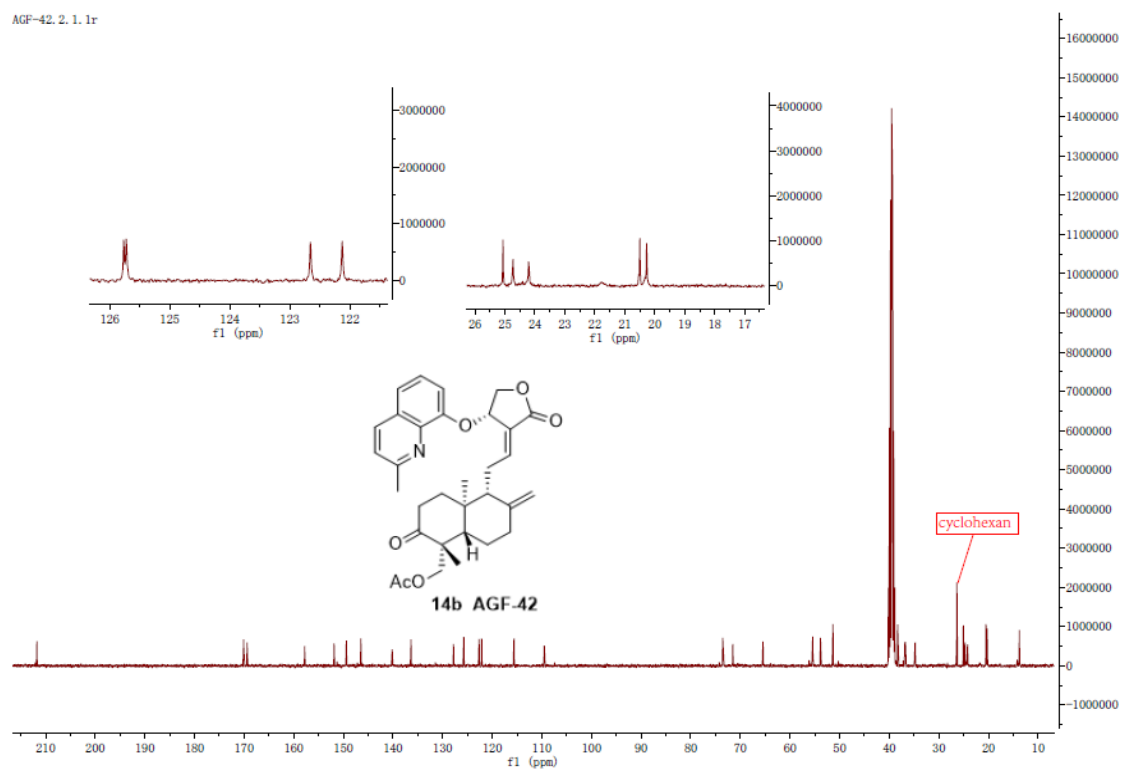

# <sup>1</sup>H NMR of 15a

AGF-6. 1. 1. 1r

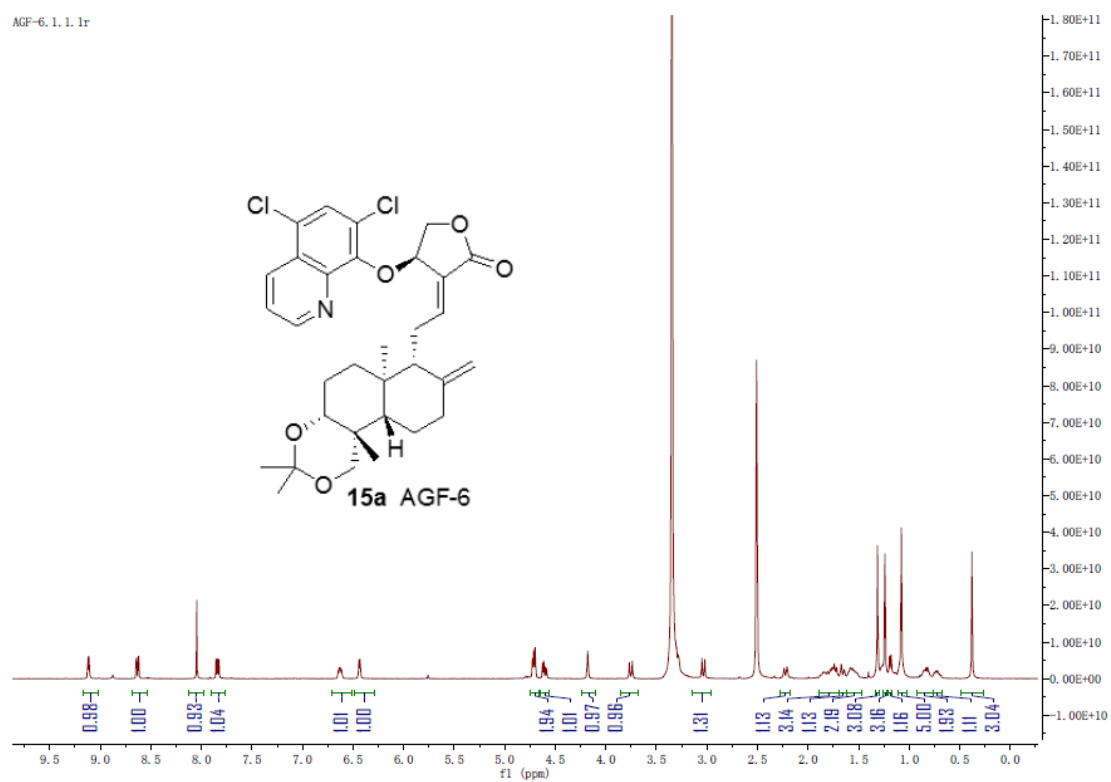

# <sup>13</sup>C NMR of 15a

AGF-6. 1. 1. 1r

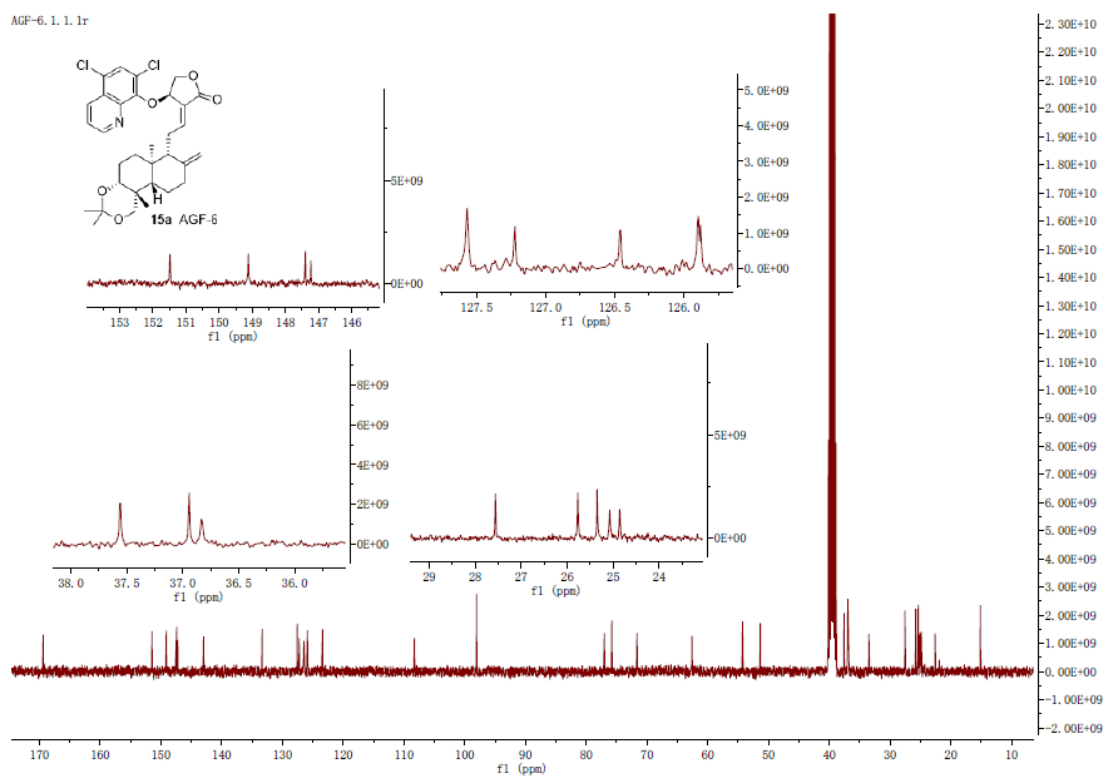

# <sup>1</sup>H NMR of **15b**

AGF-12. 1. 1. 1r

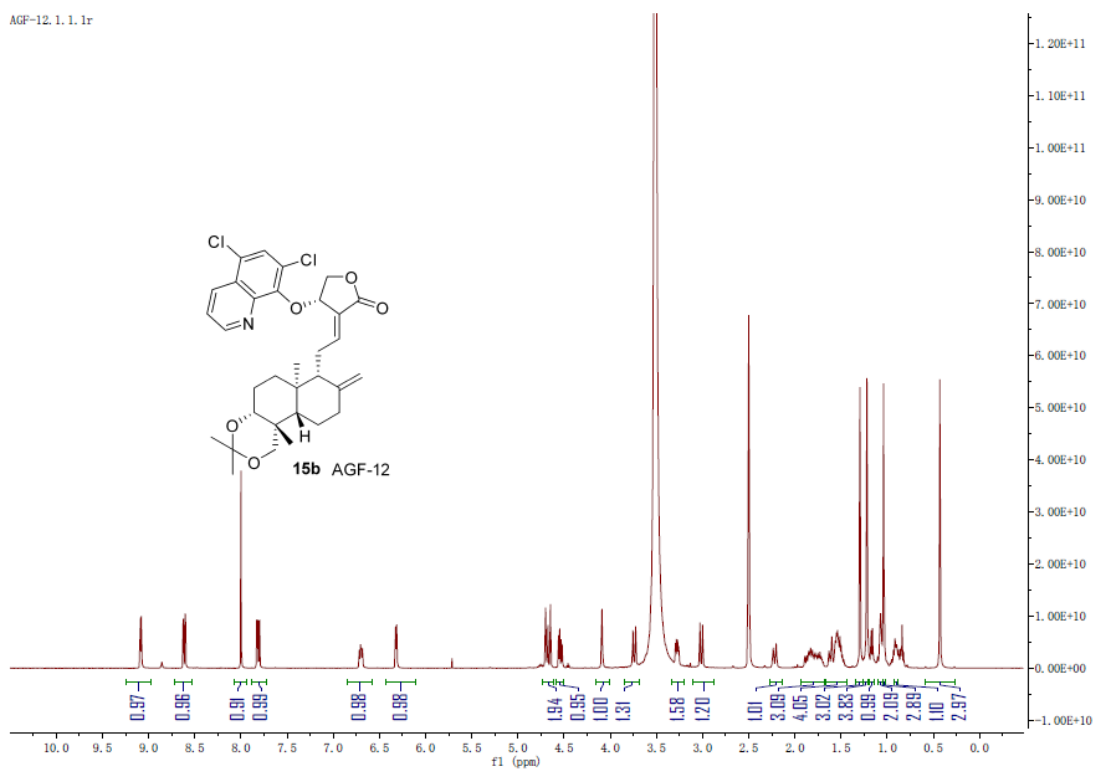

# <sup>13</sup>C NMR of **15b**

AGF-12. 2. 1. 1r

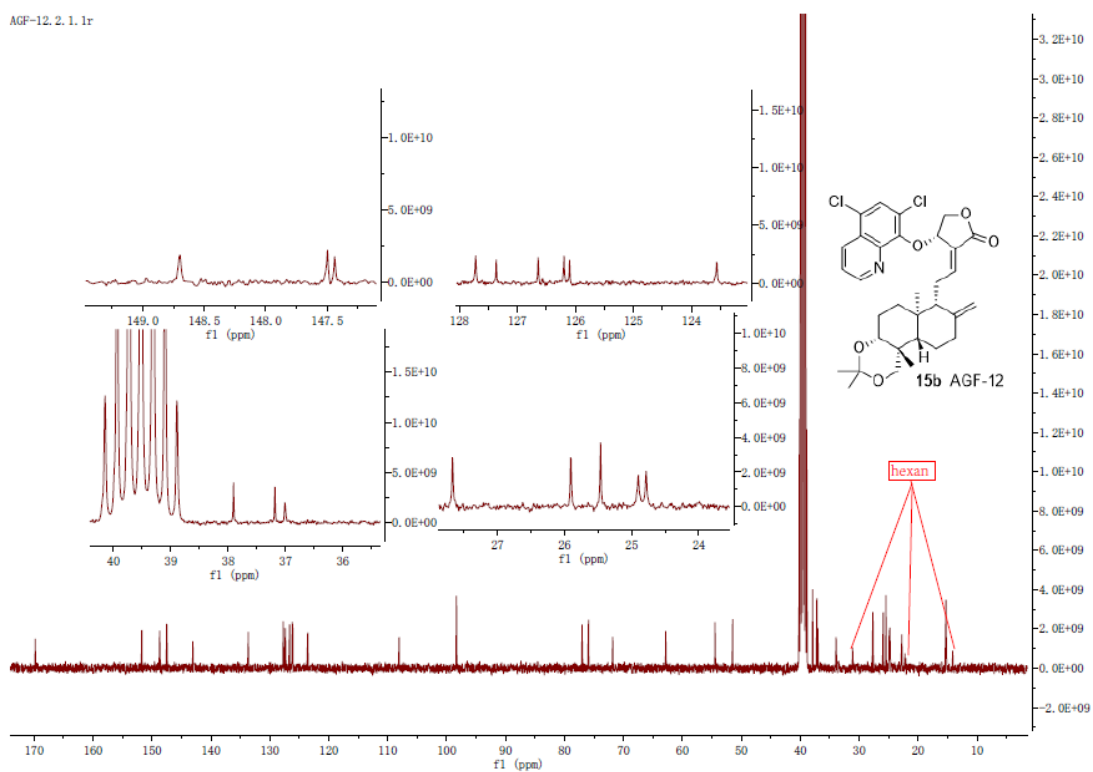

# <sup>1</sup>H NMR of 16a

agf-8.1.1.1r

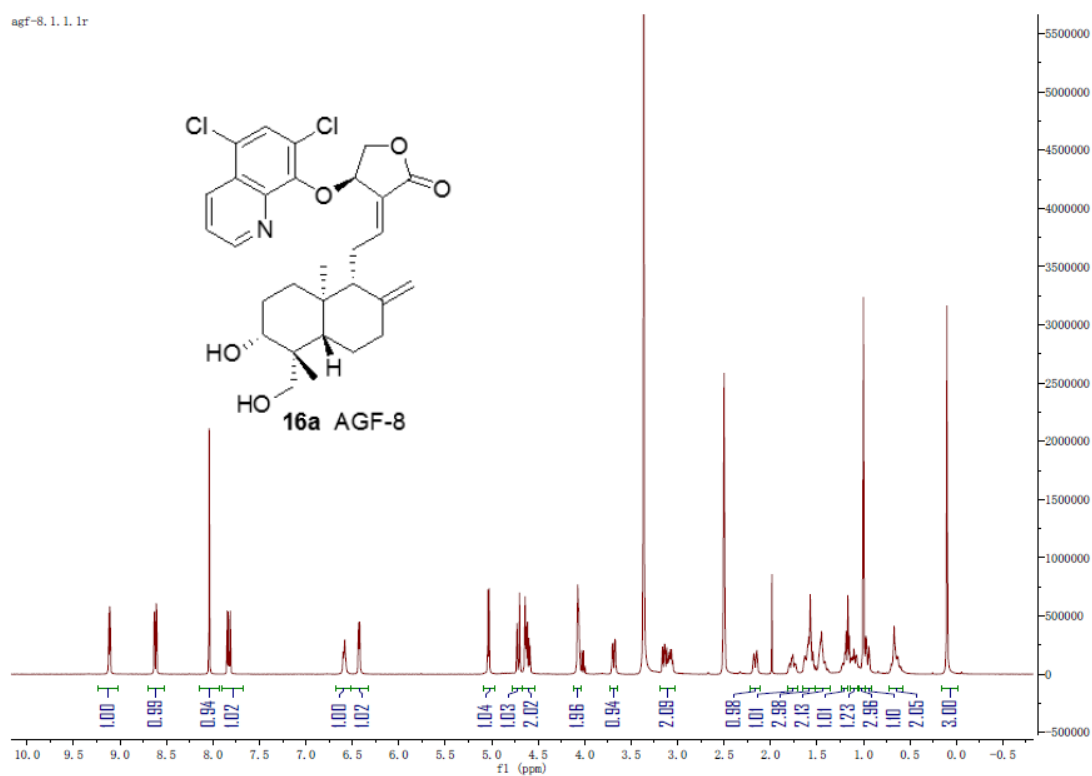

# <sup>13</sup>C NMR of 16a

AGF-8.1.1.1r

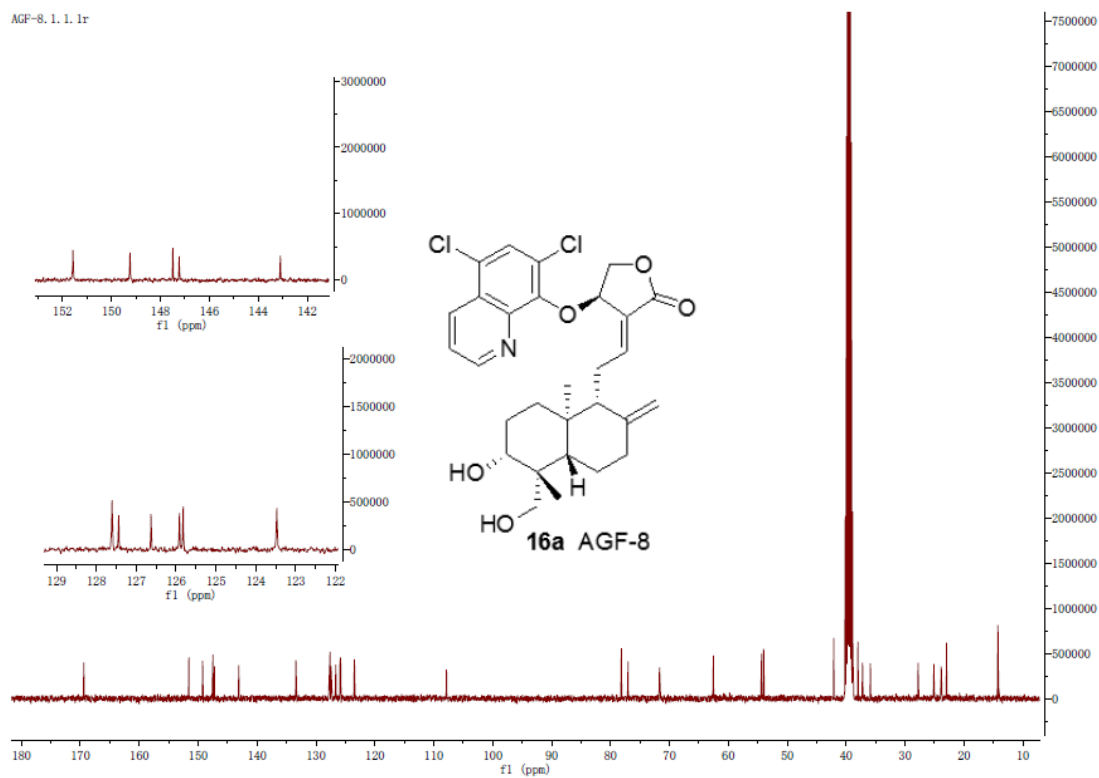

# <sup>1</sup>H NMR of 16b

20190405-F. 11. 1. 1r  
AGF-14

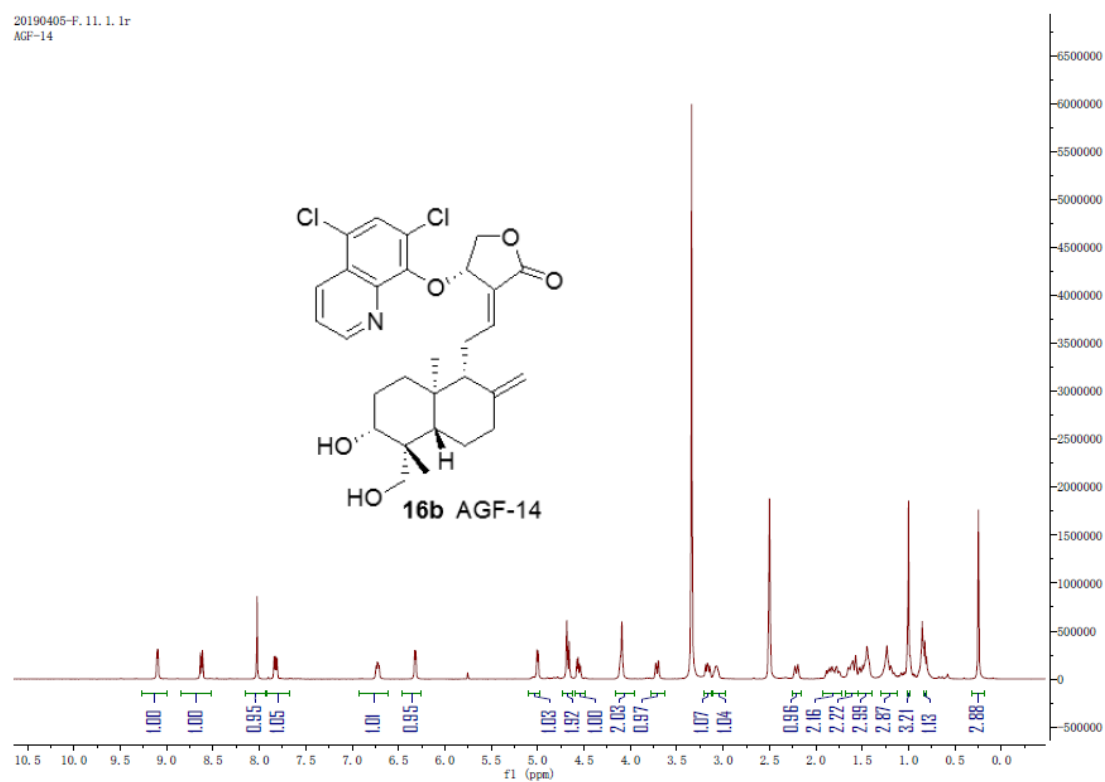

# <sup>13</sup>C NMR of 16

20190405-F. 12. 1. 1r  
AGF-14

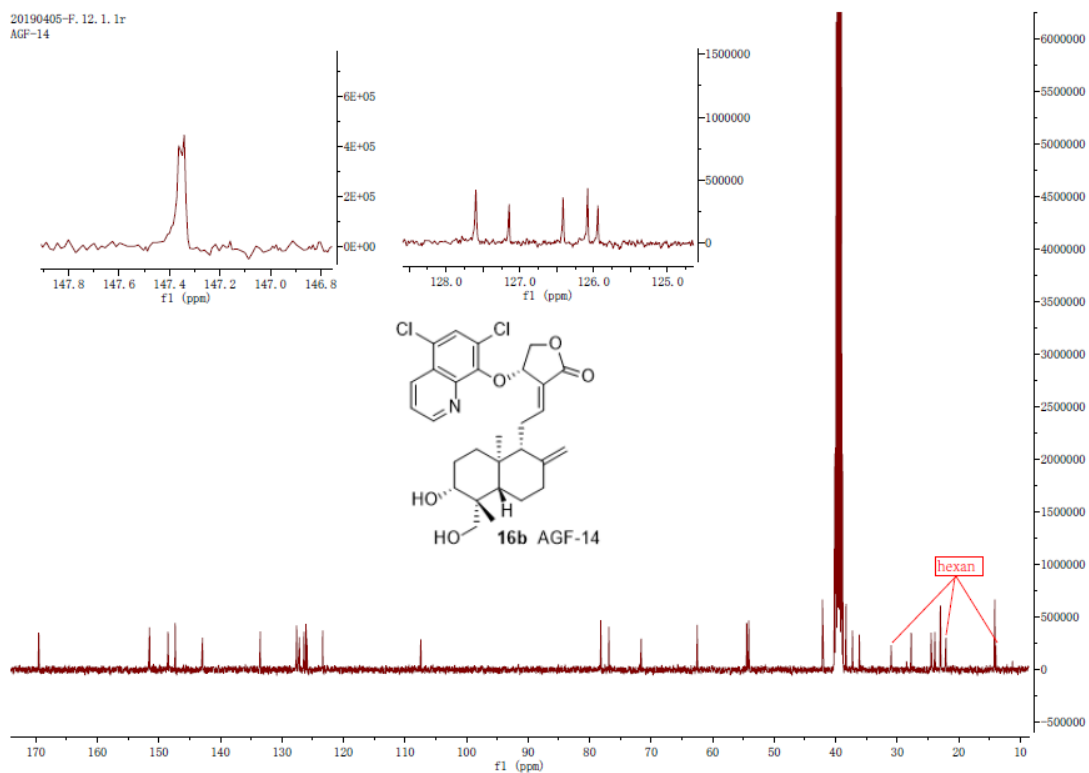

# <sup>1</sup>H NMR of 17a

AGF-44-180331.1.1.1r

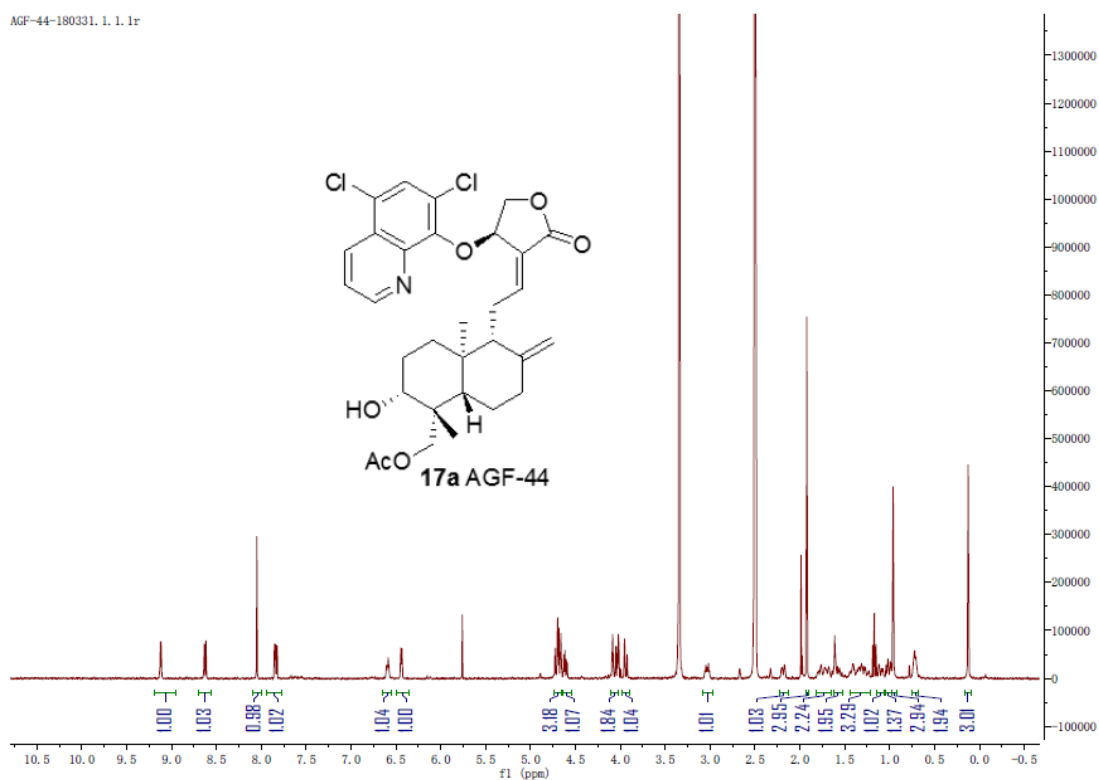

# <sup>13</sup>C NMR of 17a

20190411-F.100.1.1r  
AGF-44

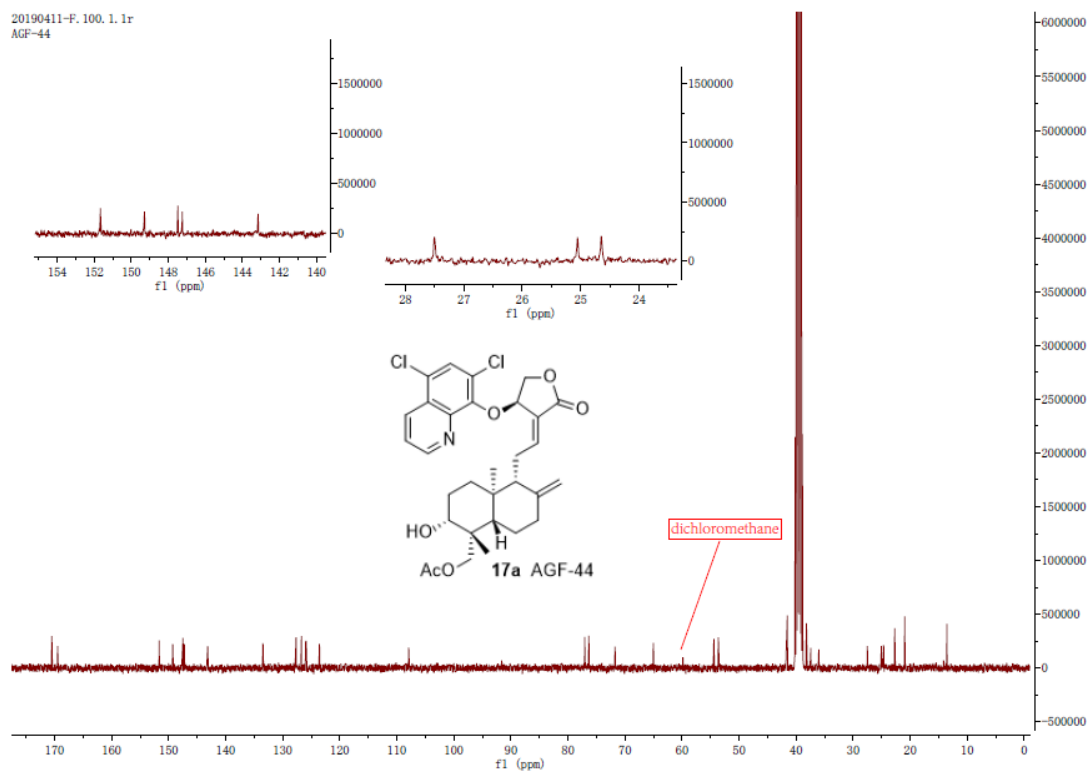

# <sup>1</sup>H NMR of **17b**

AGF-39. 1.1.1r

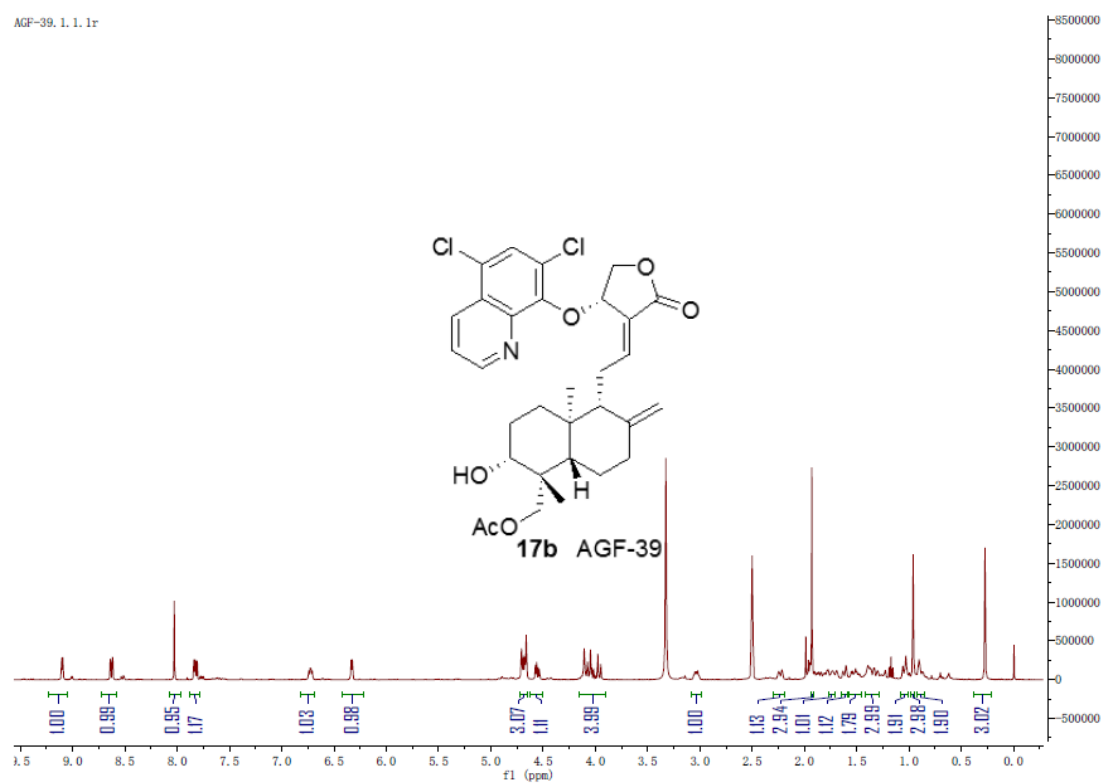

# <sup>13</sup>C NMR of **17b**

AGF-39. 1.1.1r

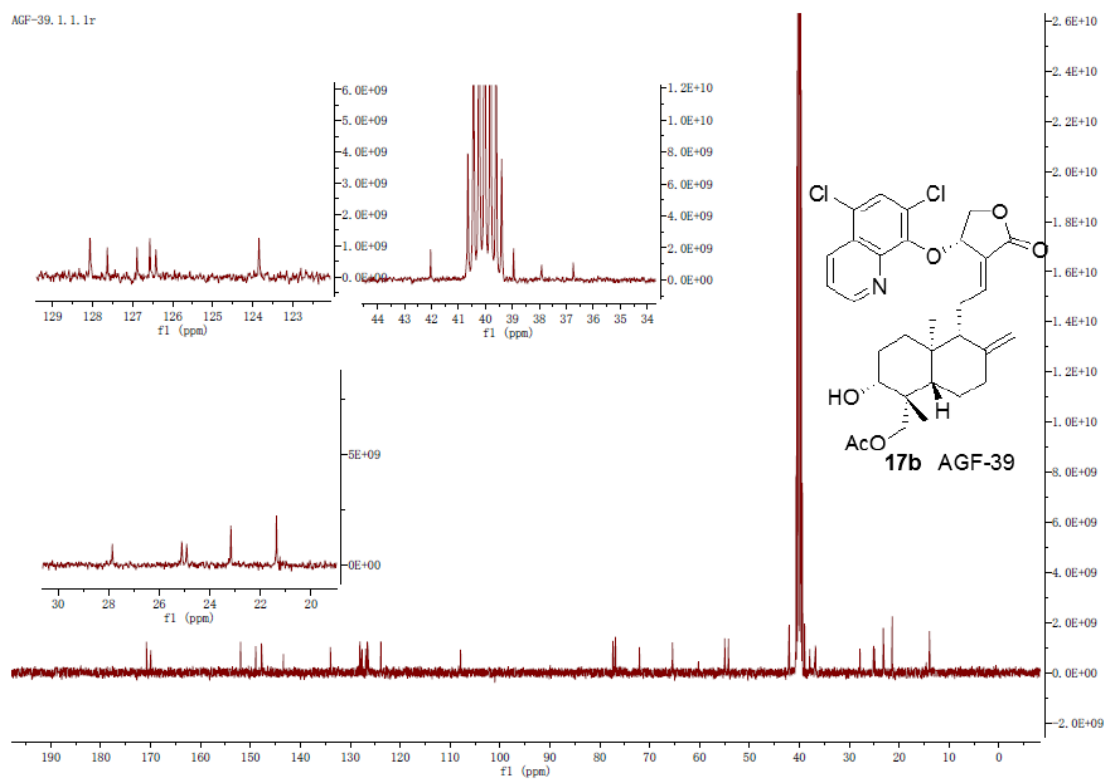



# <sup>1</sup>H NMR of **18a**

agf-45. 1. 1. 1r

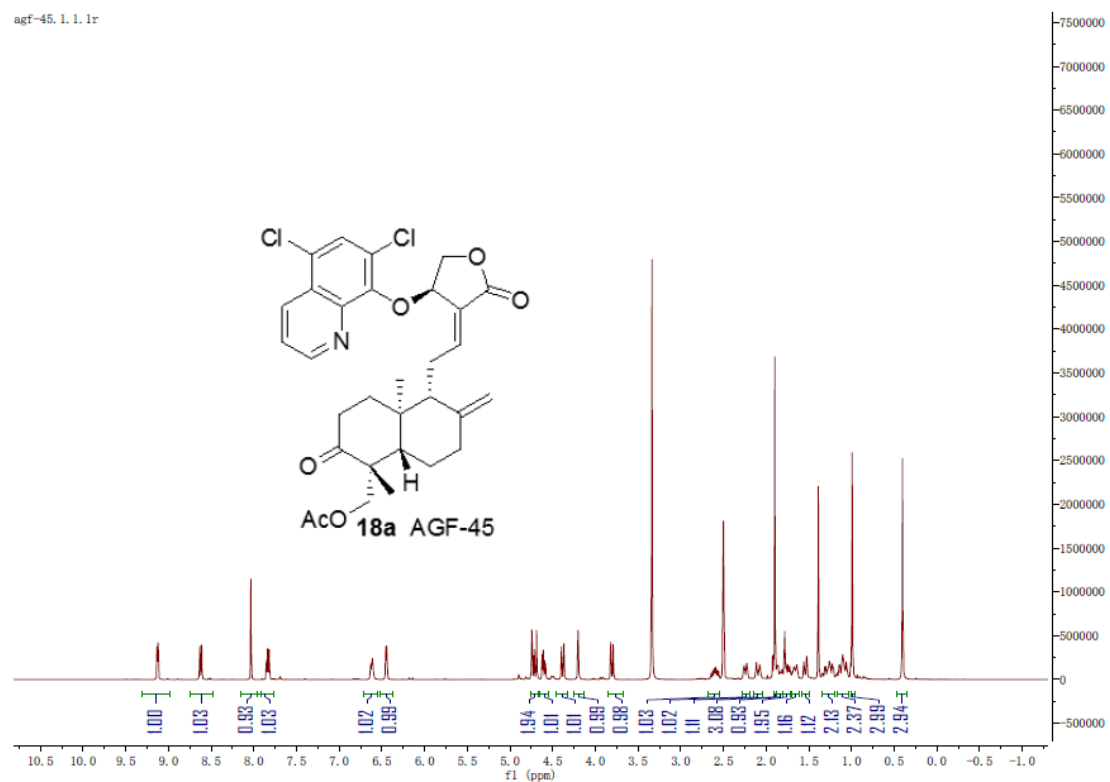

# <sup>13</sup>C NMR of **18a**

AGF-45. 10. 1. 1r

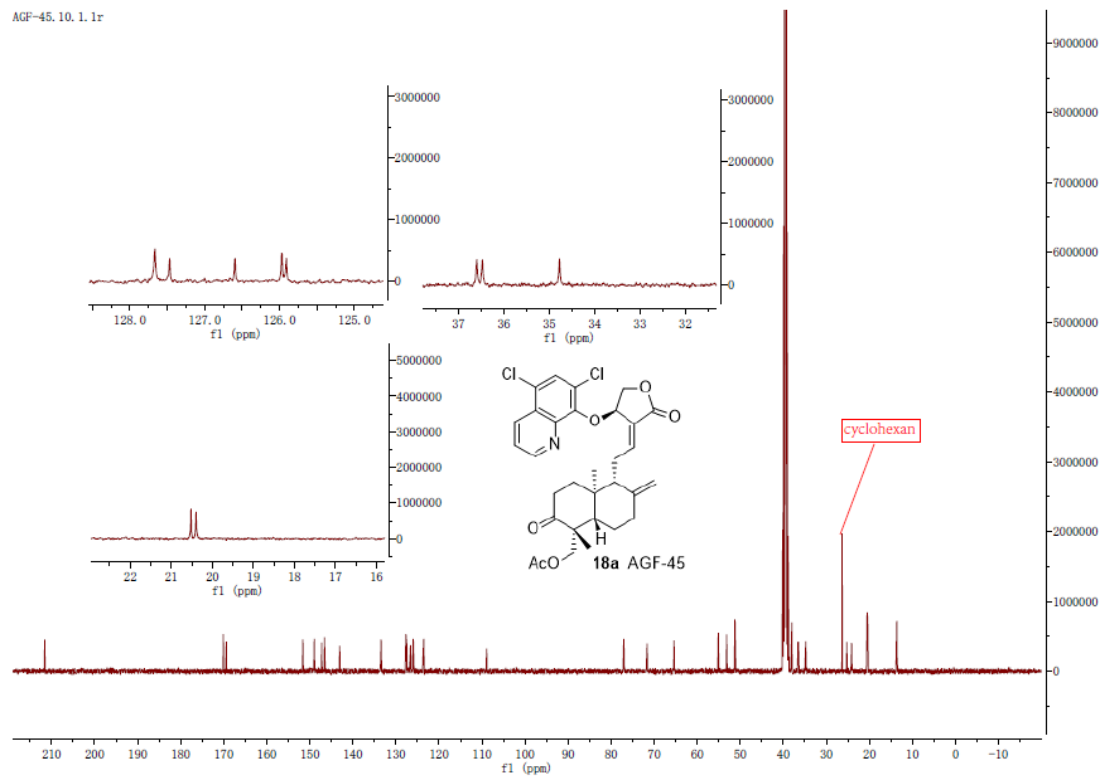

# <sup>1</sup>H NMR of **18b**

20190409-f. 10. 1. 1r  
AGF-40

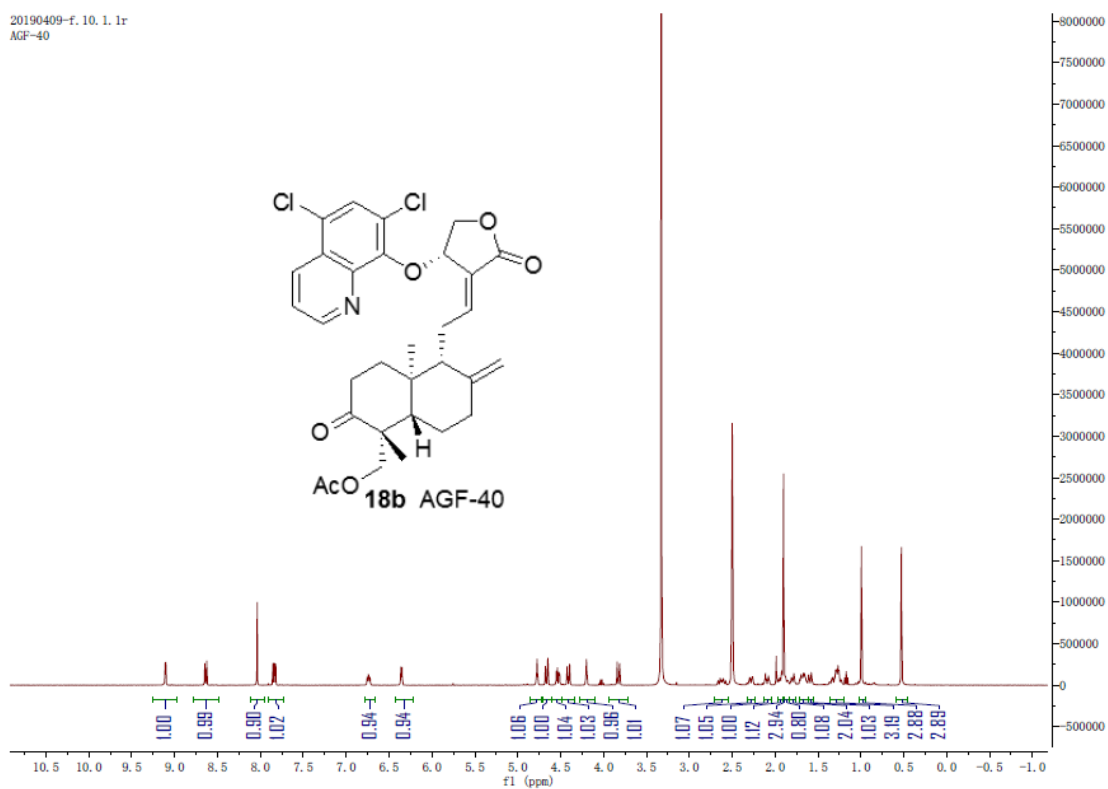

# <sup>13</sup>C NMR of **18b**

AGF-40. 2. 1. 1r

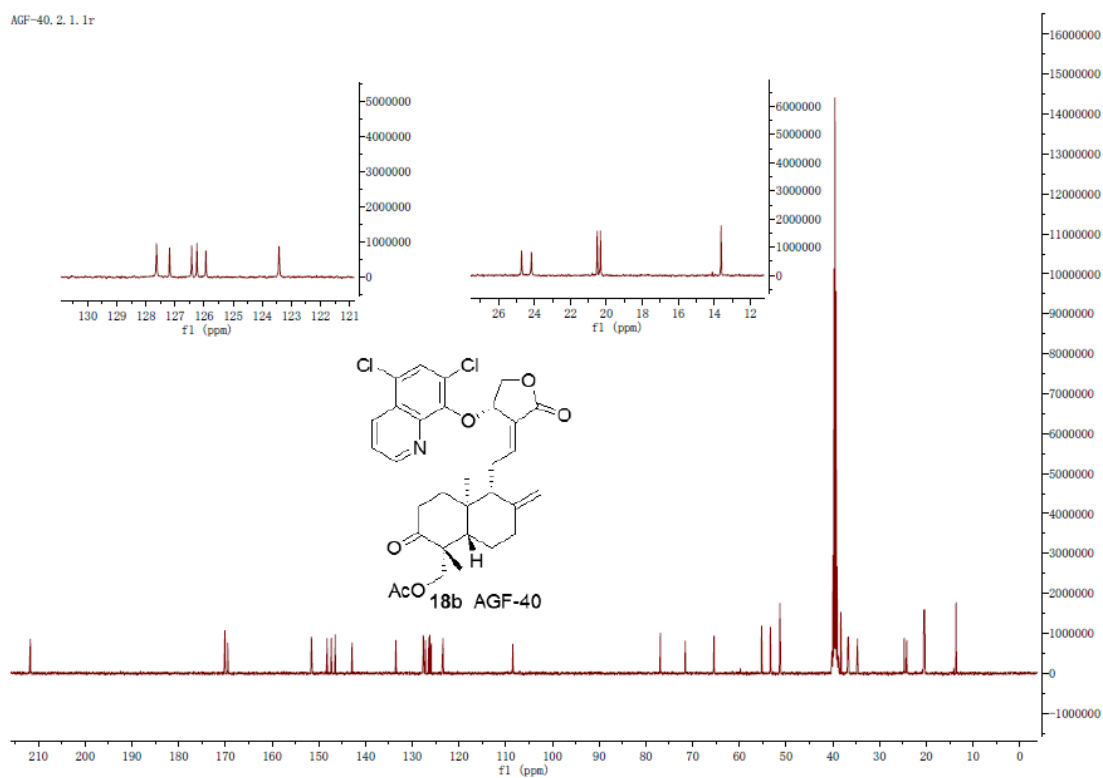

### **Details for compound dilutions and viral inoculation for screening**

SNB-19 cells were seeded overnight into 96-well plates to achieve 20,000-30,000 cells the next day. In 96-well compound dilution plates, 300 $\mu$ l of 1X complete DMEM media (DMEM, 10% FBS, 1% PSA 1% NEAA to column 1 and 200 $\mu$ l of 1X complete DMEM media to columns 2-12. Individual compounds in a volume of 0.9  $\mu$ l at 10mM concentration was added to each well in column 1, for a total of 8 compounds per 96-well plate. Each well in column 1 was mixed 5 times; then, 100 $\mu$ l was removed from column 1 and added to column 2 and mixed. This process was repeated for each dilution across columns 1-12 to achieve an 11-fold dilution range of 30 $\mu$ M-0.001 $\mu$ M (30 $\mu$ M, 10 $\mu$ M, 3 $\mu$ M, 1 $\mu$ M, 0.3 $\mu$ M, 0.1 $\mu$ M, 0.03 $\mu$ M, 0.01 $\mu$ M, 0.003 $\mu$ M, 0.001 $\mu$ M). Column 12 was the no compound control. Day old media from SNB-19 cells was removed by aspiration and 100 $\mu$ l of each drug dilution was added to the previously seeded SNB-19 cells. After a 1 hour incubation at 37 °C and 5% CO<sub>2</sub>, high titer Zika virus (strain PRVABC59) was added to cells at MOI = 1, and incubated for 24 hours.

### HPLC analysis spectra

HPLC analysis condition: Sunfire C18 column (4.6 × 250 mm, 5 μm), elution by 90% methanol with 10% purified water (for compounds of **2**, **3**, **5**, **8**, **11a**, **11b**, **14a**, **14b**, **15a**, **15b**, **18a**, **18b**) or 80% methanol with 20% purified water (for compounds of **4**, **6**, **7**, **9**, **12a**, **12b**, **13a**, **13b**, **16a**, **16b**, **17a**, **17b**), rate = 1.0 ml/min, detection wavelength of 230 nm.

#### HPLC spectrum of **2** (purity >98%)

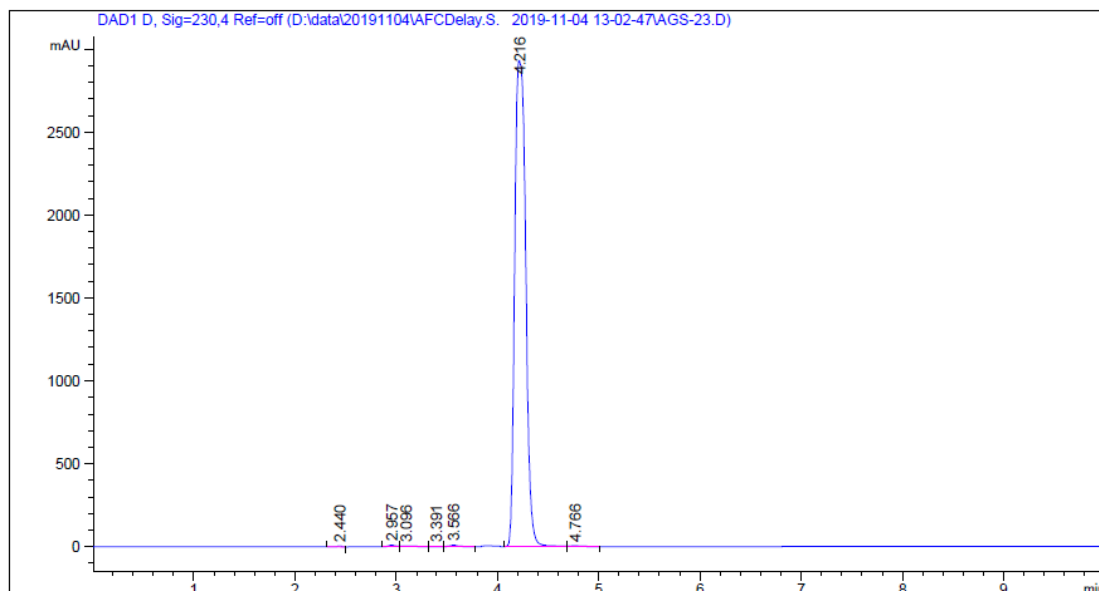

#### HPLC spectrum of **3** (purity >98%)

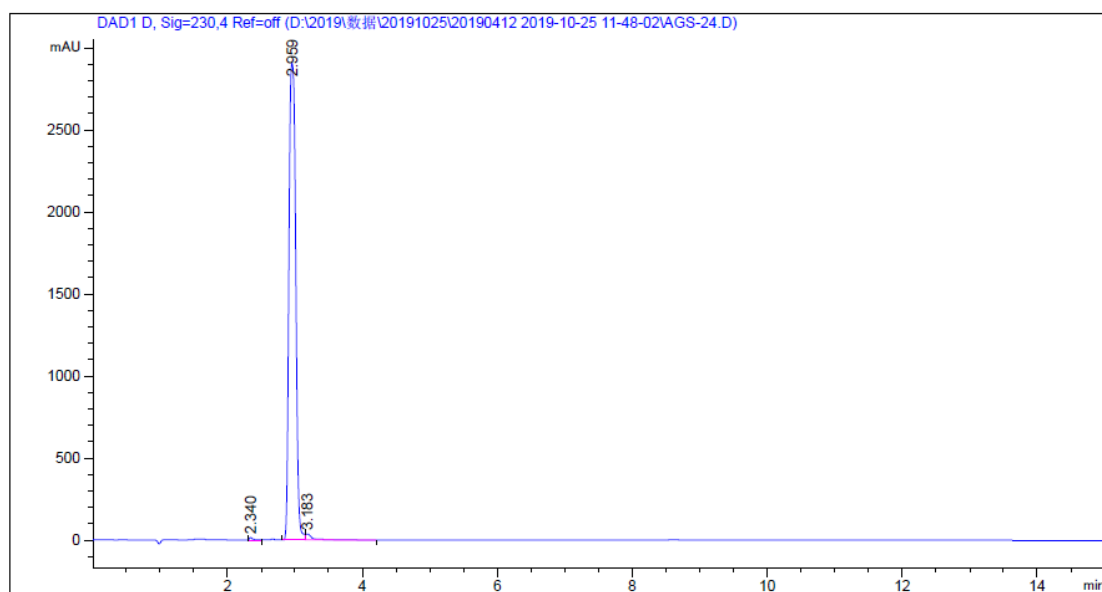

### HPLC spectrum of **4** (purity >95%)

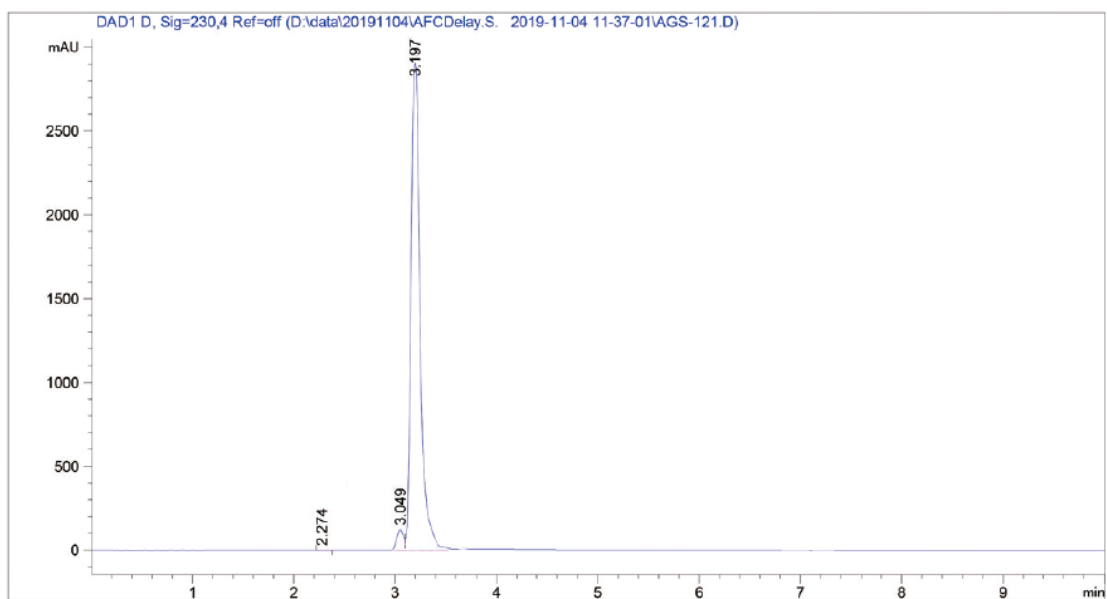

### HPLC spectrum of **5** (purity >98%)

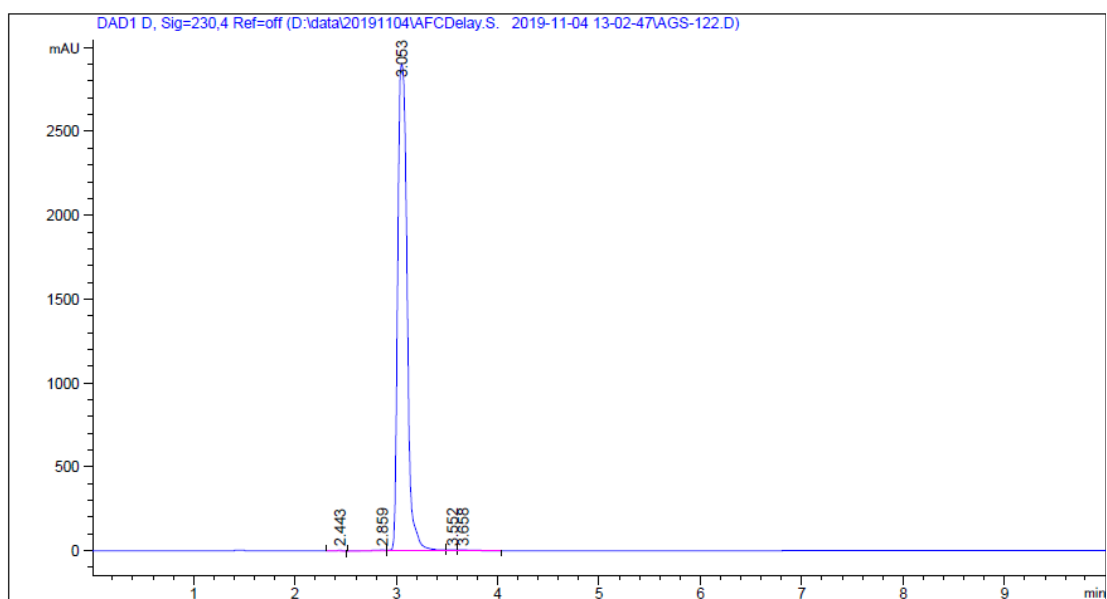

HPLC spectrum of **6** (purity >95%)

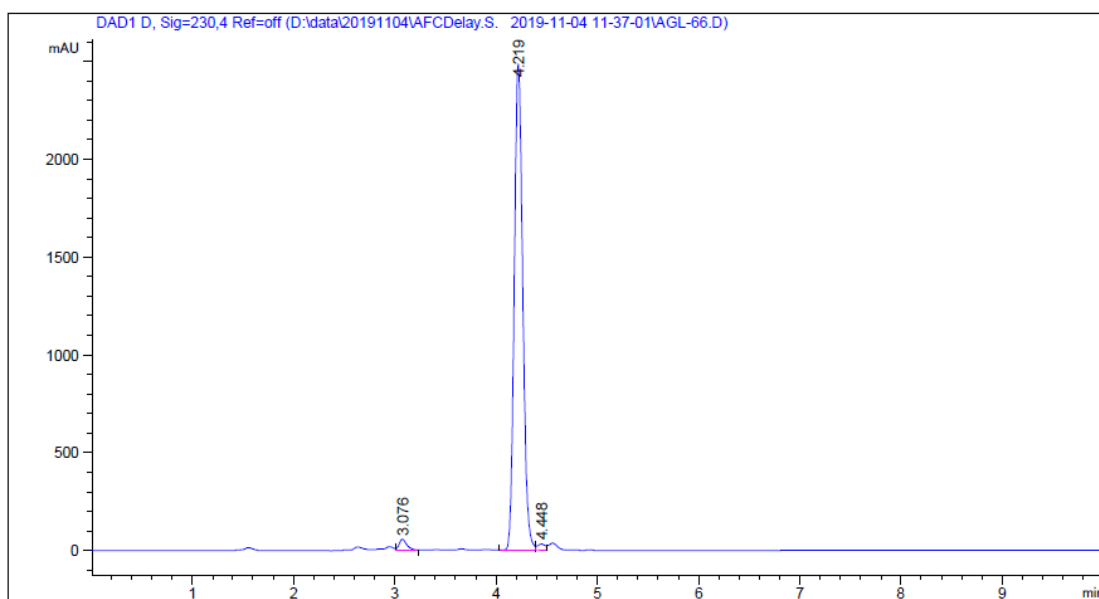

HPLC spectrum of **7** (purity >95%)

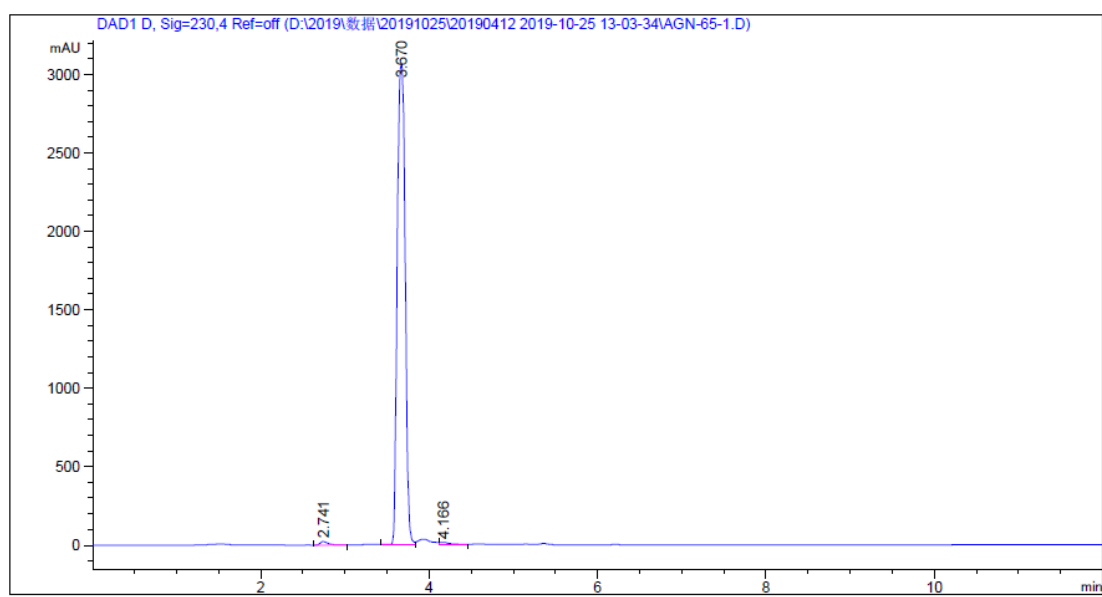

HPLC spectrum of **8** (purity >97%)

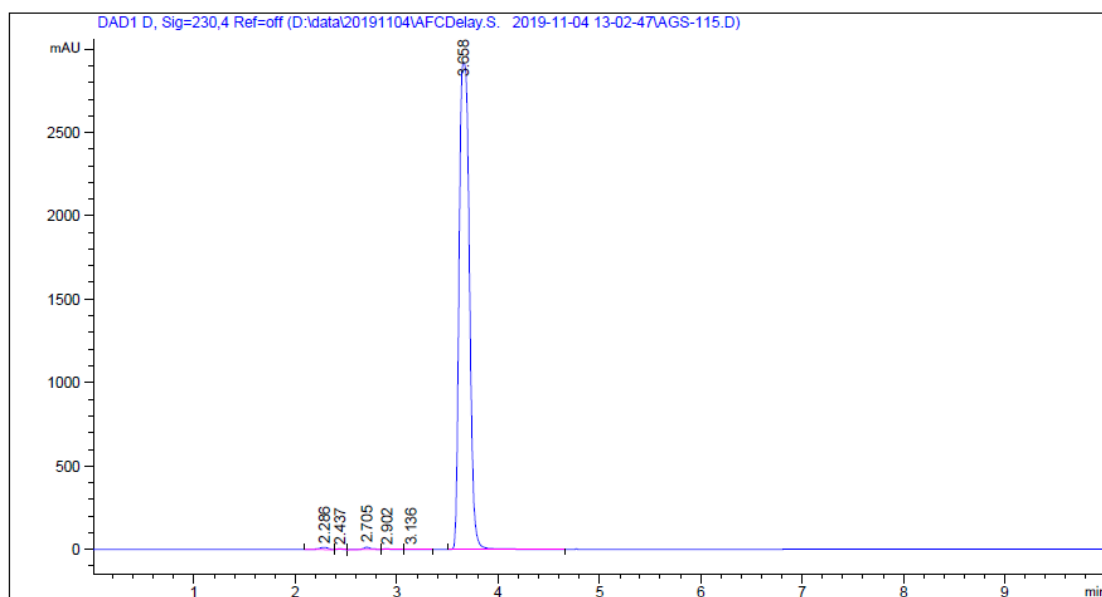

HPLC spectrum of **9** (purity >97%)

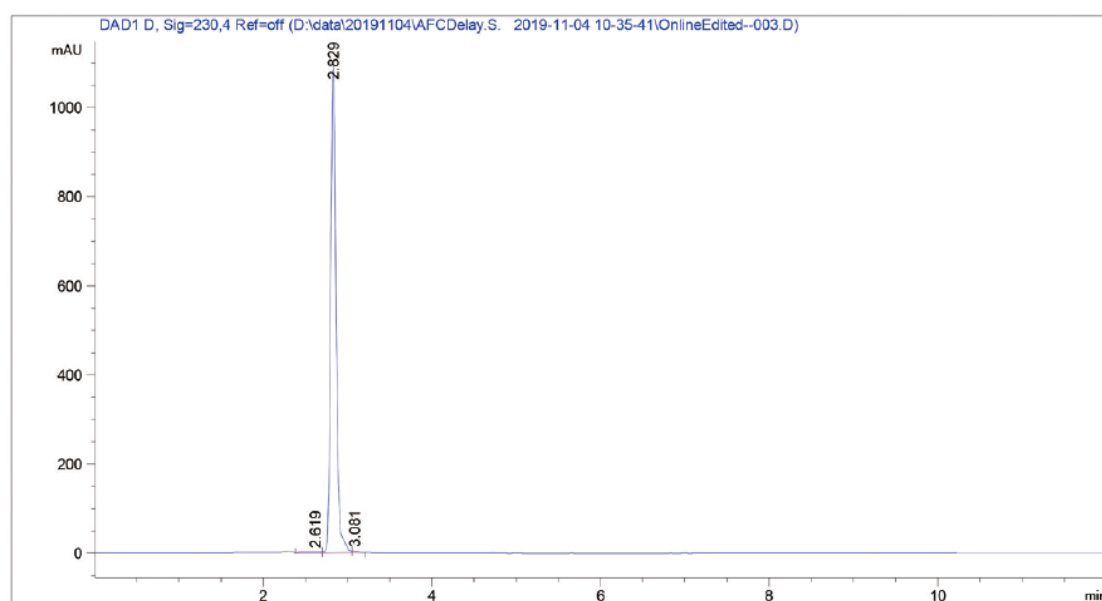

HPLC spectrum of **11a** (purity >98%)

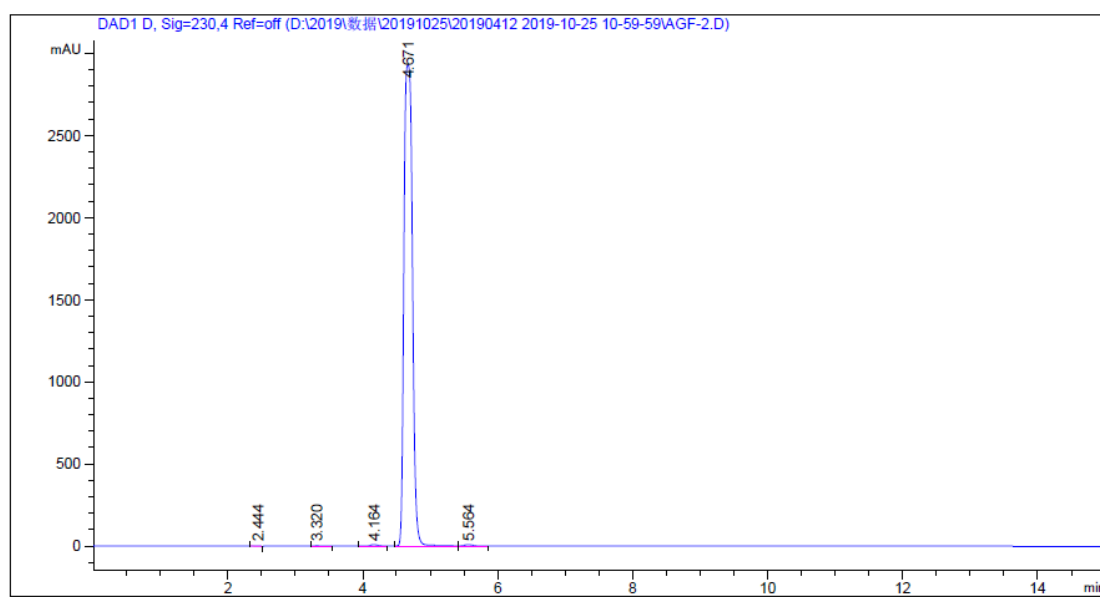

HPLC spectrum of **11b** (purity >98%)

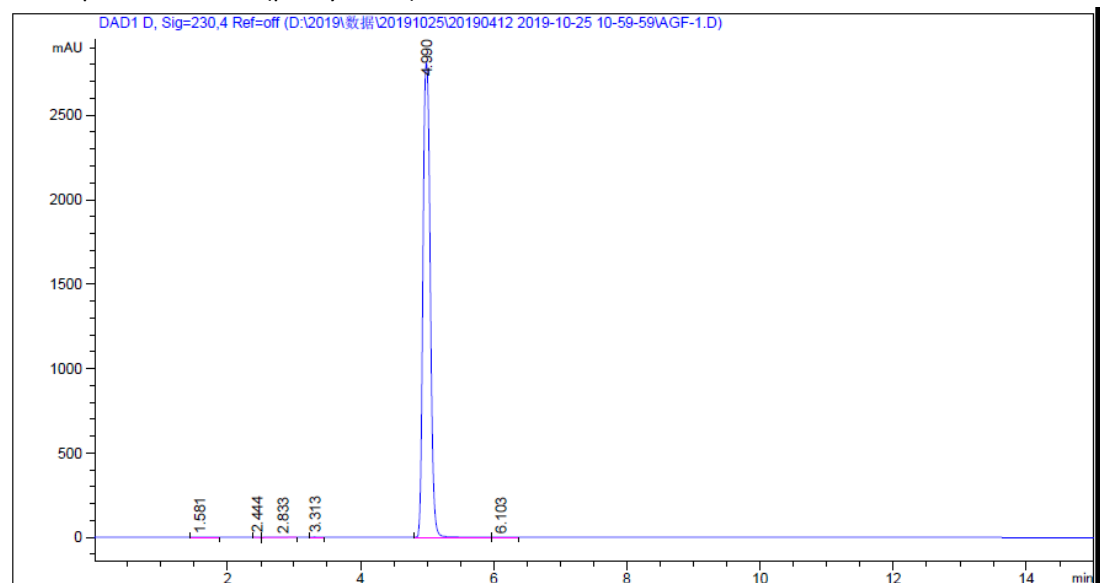



HPLC spectrum of **12a** (purity >97%)

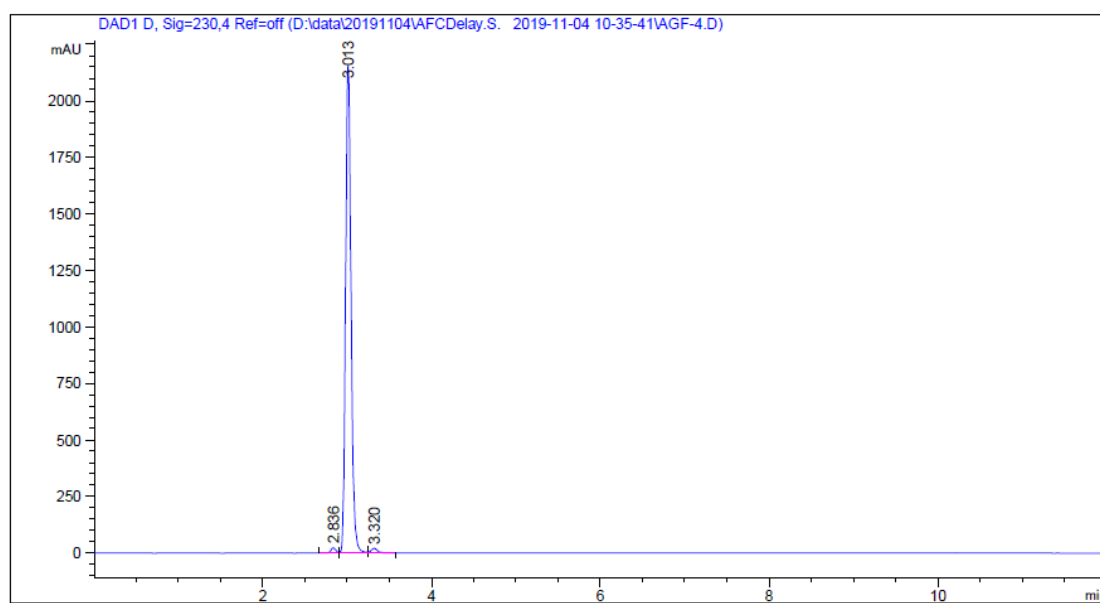

HPLC spectrum of **12b** (purity >95%)

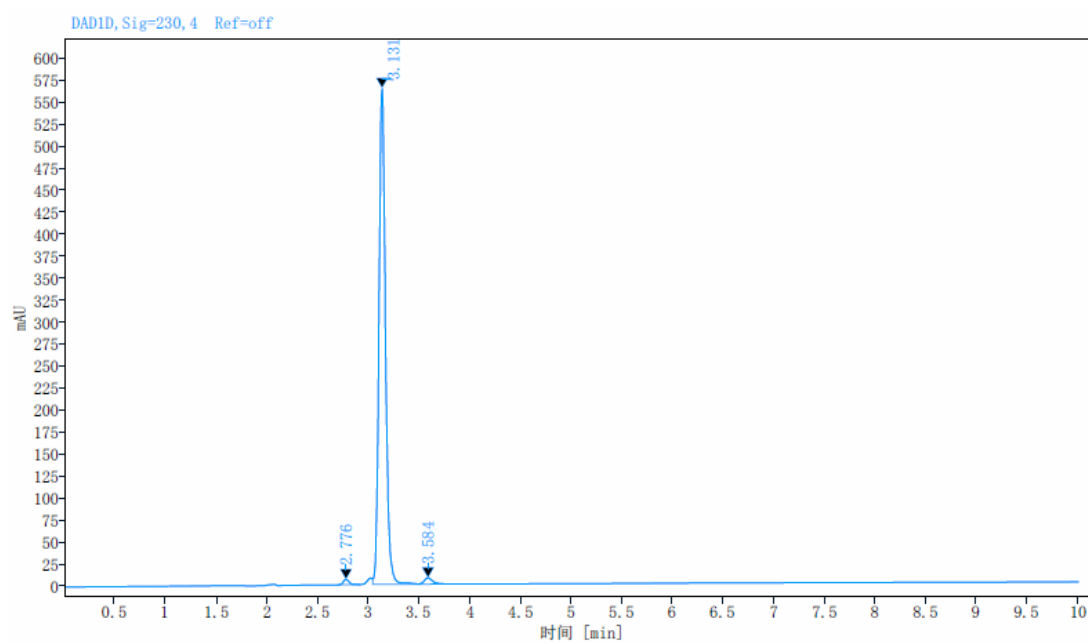

HPLC spectrum of **13a** (purity >98%)

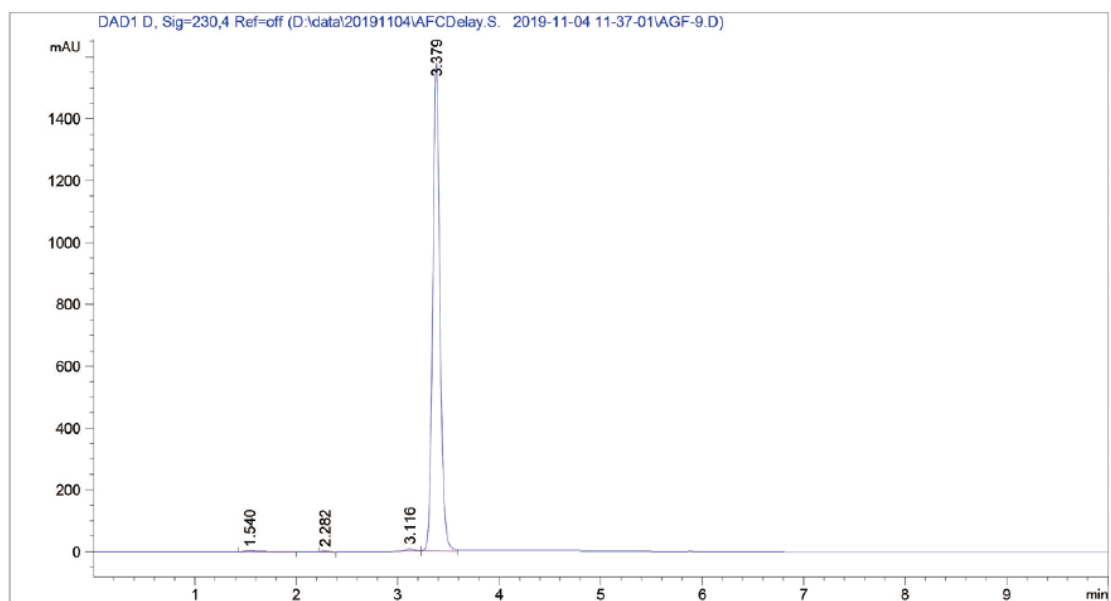

HPLC spectrum of **13b** (purity >98%)

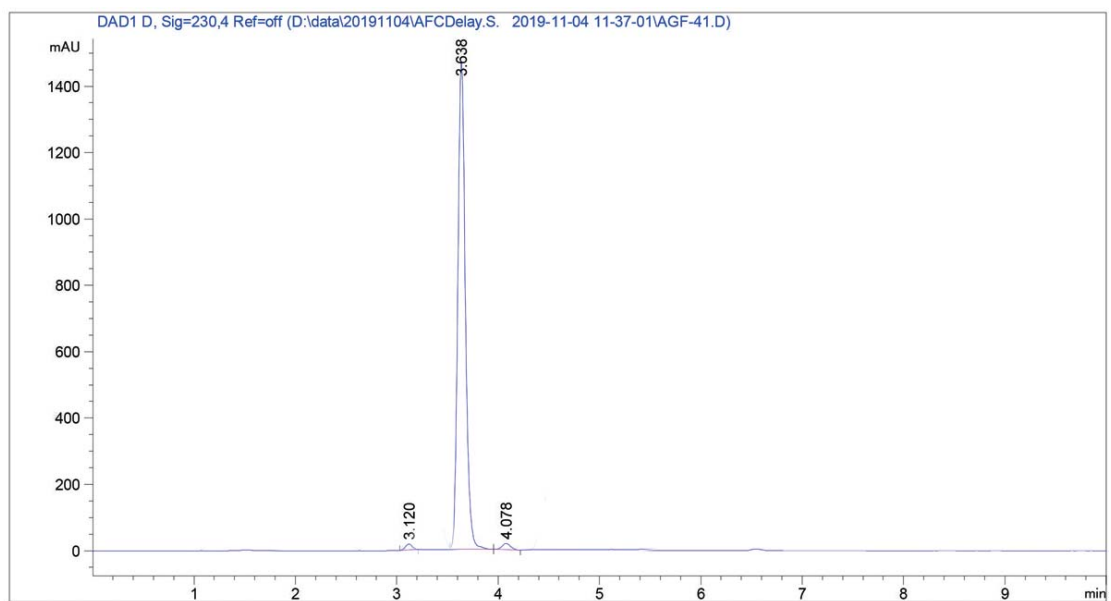

HPLC spectrum of **14a** (purity >98%)

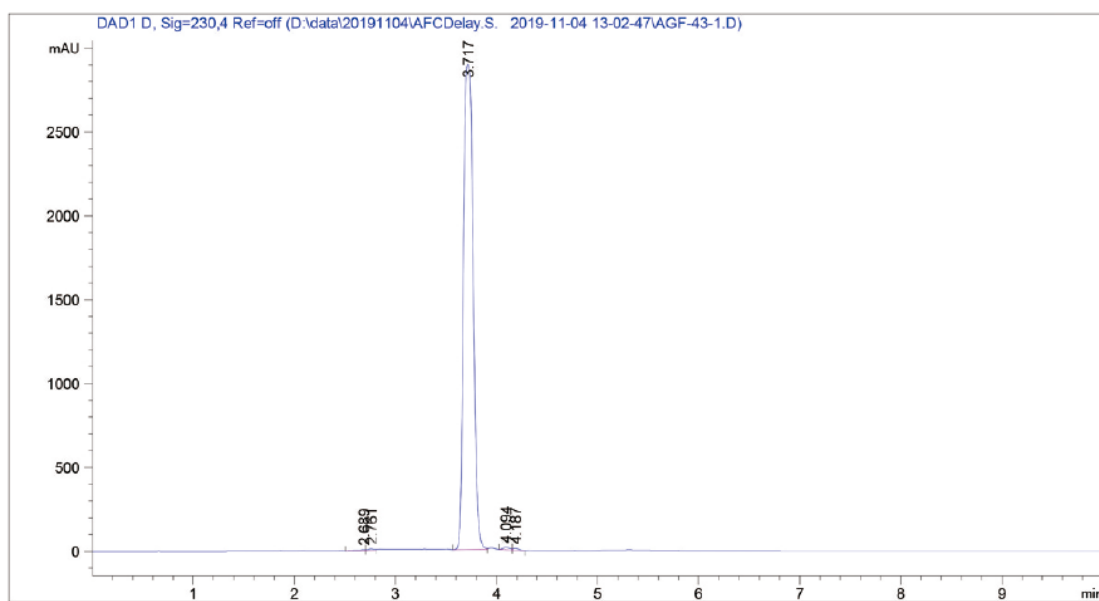

HPLC spectrum of **14b** (purity >95%)

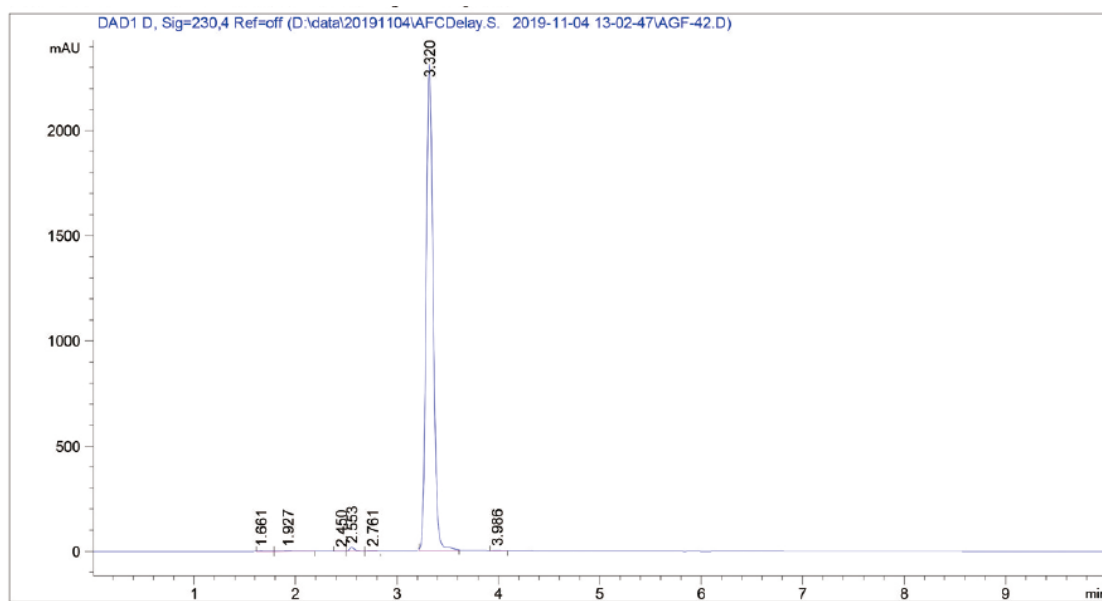

HPLC spectrum of **15a** (purity >98%)

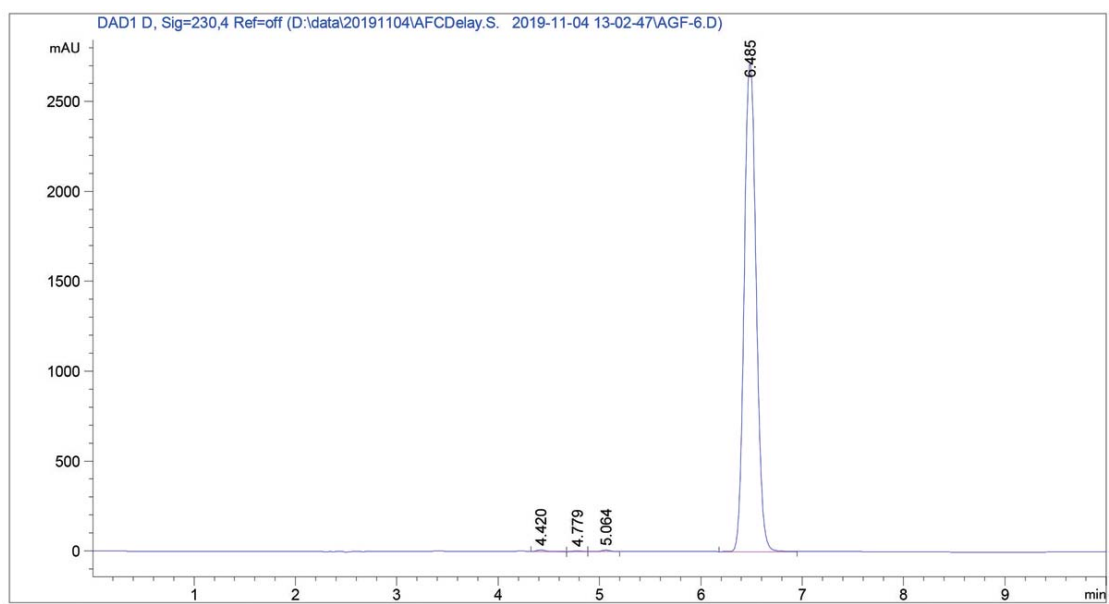

HPLC spectrum of **15b** (purity >95%)

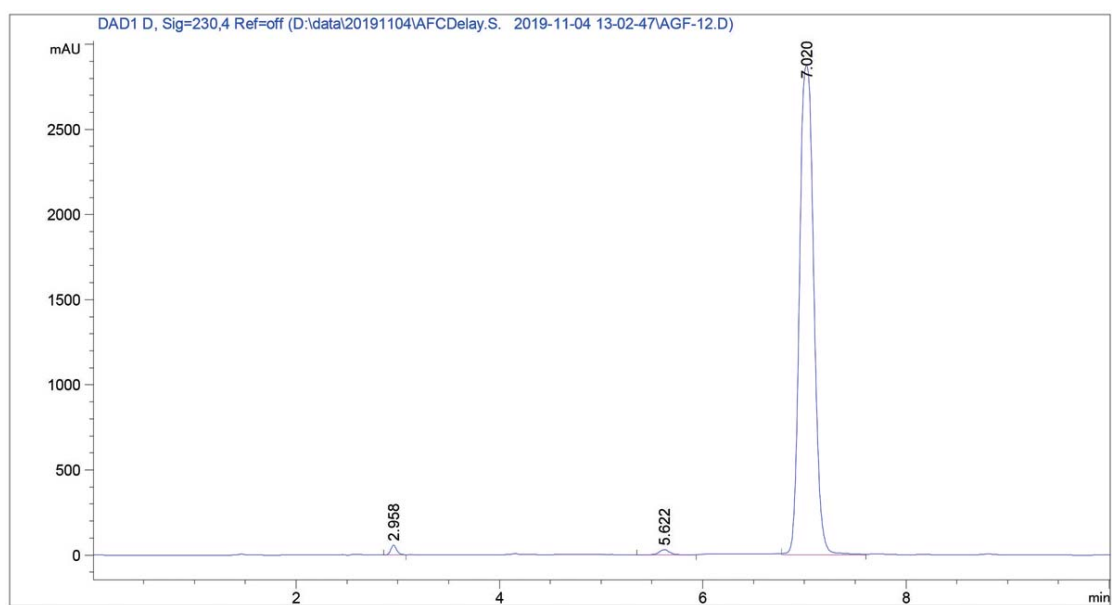

HPLC spectrum of **16a** (purity >96%)

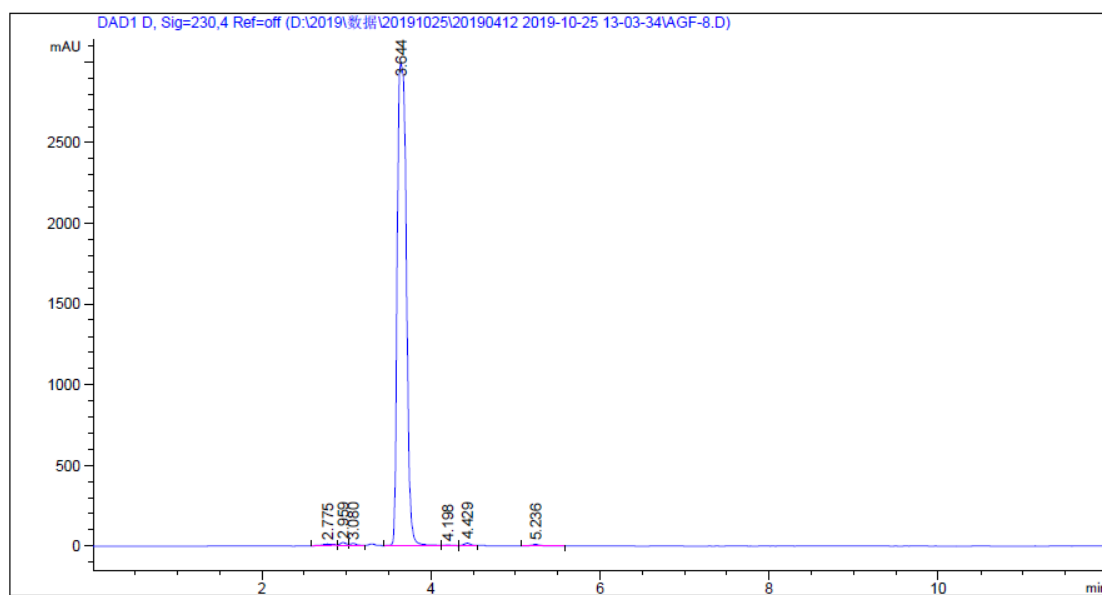

HPLC spectrum of **16b** (purity >96%)

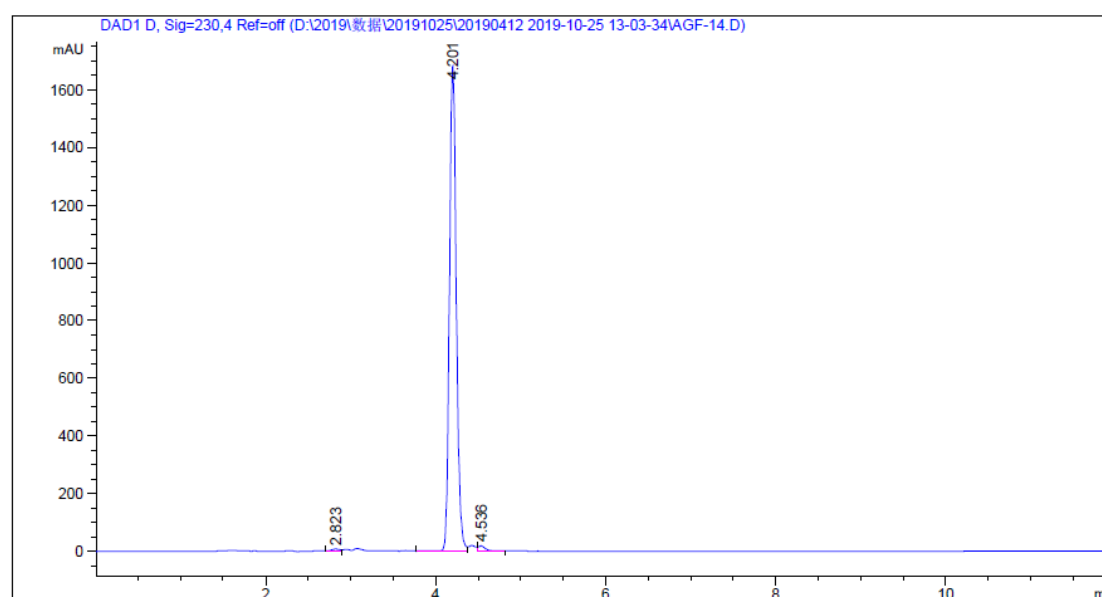

HPLC spectrum of **17a** (purity >95%)

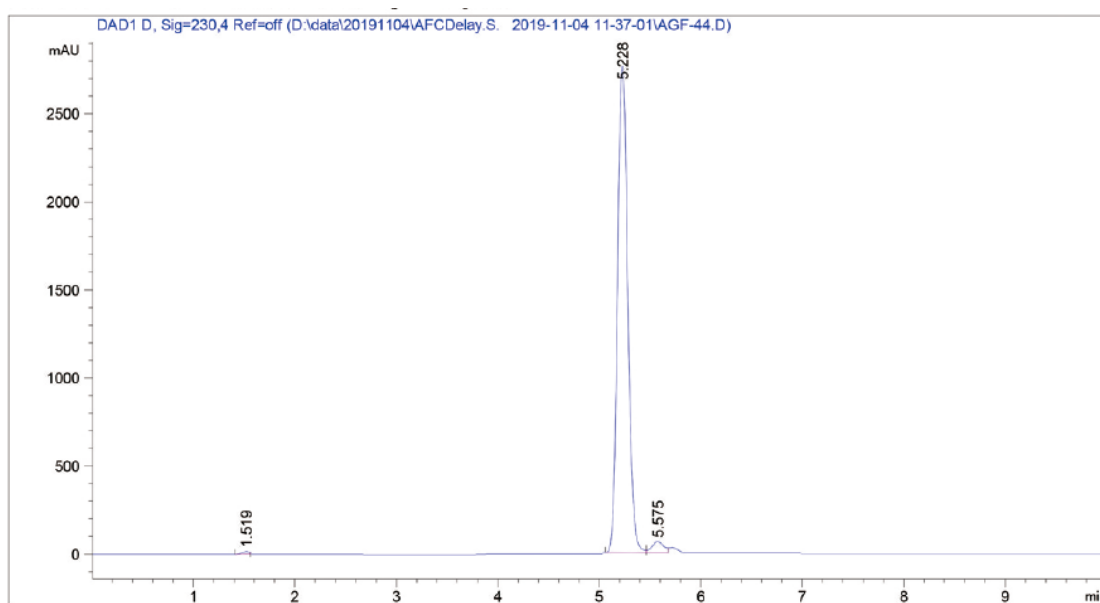

HPLC spectrum of **17b** (purity >98%)

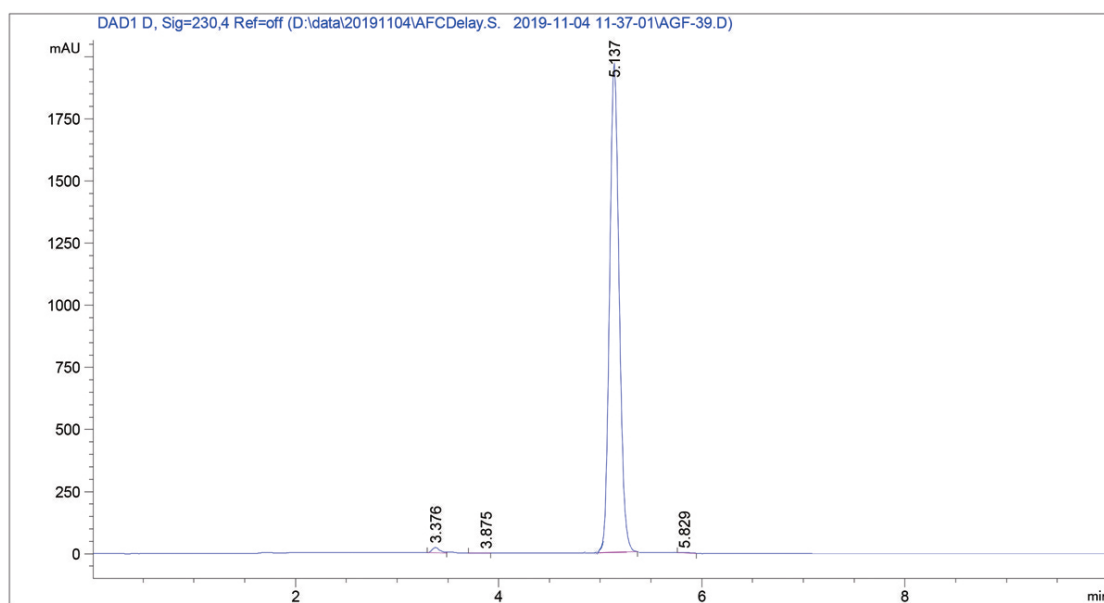

HPLC spectrum of **18a** (purity >97%)

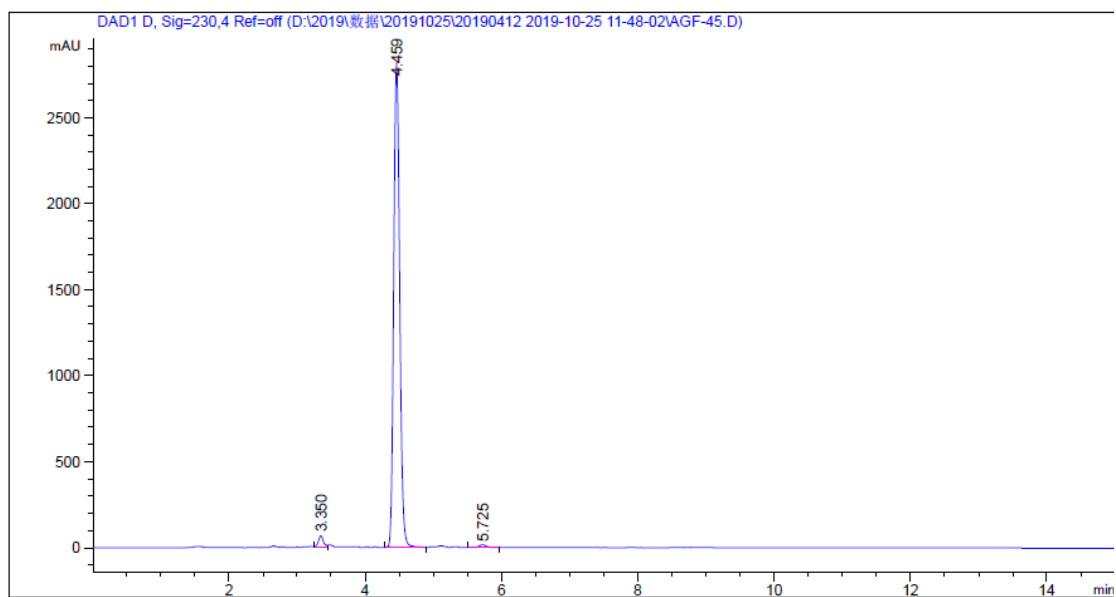

HPLC spectrum of **18b** (purity >98%)

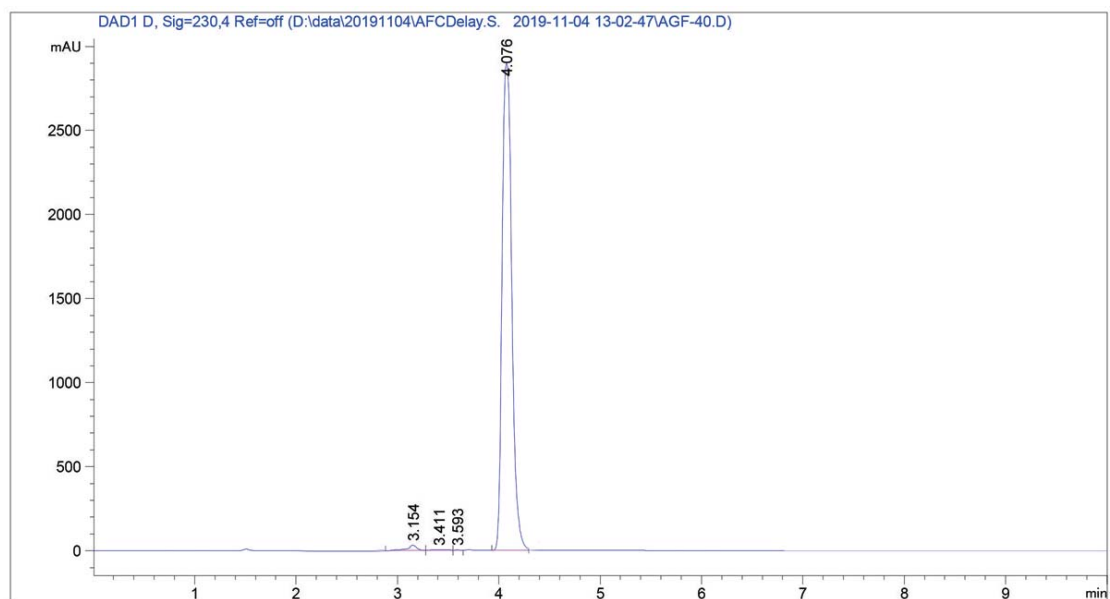

Supplement: NIHMS1546477-supplement-1.pdf [file NIHMS1546477-supplement-1.pdf]
